## **Strong and specific connections between retinal axon mosaics and midbrain neurons revealed by large scale paired recordings**

Jérémie Sibille<sup>1-4</sup>, Carolin Gehr<sup>1-4</sup>, Jonathan I. Benichov<sup>5</sup>, Hymavathy Balasubramanian<sup>1-4</sup>, Kai Lun Teh<sup>1-4</sup>, Tatiana Lupashina<sup>1-4</sup>, Daniela Vallentin<sup>5</sup>, Jens Kremkow<sup>1-4</sup>

<sup>1</sup>Neuroscience Research Center, Charité-Universitätsmedizin Berlin, Charitéplatz 1, 10117 Berlin

<sup>2</sup>Bernstein Center for Computational Neuroscience Berlin, Philippstraße 13, 10115 Berlin

<sup>3</sup>Institute for Theoretical Biology, Humboldt-Universität zu Berlin, Philippstraße 13, 10115 Berlin

<sup>4</sup>Einstein Center for Neurosciences Berlin, Charitéplatz 1, 10117 Berlin

<sup>5</sup>Max Planck Institute for Ornithology, Eberhard-Gwinner Straße, 82319 Seewiesen

Send correspondence to:

Jens Kremkow

Neuroscience Research Center

Charité - Universitätsmedizin Berlin

Charitéplatz 1

10117 Berlin, Germany

Phone: +49 30 450 639081

Email: [jens.kremkow@charite.de](mailto:jens.kremkow@charite.de)

Web: [kremkowlab.com](http://kremkowlab.com), [twitter.com/KremkowL](https://twitter.com/KremkowL)

## HIGHLIGHTS

- 1 • High-density electrodes capture the activity of afferent axons and target neurons *in vivo*
- 2 • Retinal ganglion cells axons are organized in mosaics
- 3 • Single cell precise isomorphism between dendritic and axonal RGC mosaics
- 4 • Midbrain neurons are driven by sparse but strong retinal inputs
- 5 • Functional wiring of the retinotectal circuit is similar in mammals and birds

6

## 7 SUMMARY

8 The superior colliculus (SC) is a midbrain structure that plays important roles in visually guided  
9 behaviors. Neurons in the SC receive afferent inputs from retinal ganglion cells (RGC), the output  
10 cells of the retina, but how SC neurons integrate RGC activity *in vivo* is unknown. SC neurons  
11 might be driven by strong but sparse retinal inputs, thereby reliably transmitting specific retinal  
12 functional channels. Alternatively, SC neurons could sum numerous but weak inputs, thereby  
13 extracting new features by combining a diversity of retinal signals. Here, we discovered that high-  
14 density electrodes simultaneously capture the activity and the location of large populations of  
15 retinal axons and their postsynaptic SC target neurons, permitting us to investigate the  
16 retinocollicular circuit on a structural and functional level *in vivo*. We show that RGC axons in the  
17 mouse are organized in mosaics that provide a single cell precise representation of the retina as  
18 input to SC. This isomorphic mapping between retina and SC builds the scaffold for highly specific  
19 wiring in the retinocollicular circuit which we show is characterized by strong connections and  
20 limited functional convergence, established in log-normally distributed connection strength.  
21 Because our novel method of large-scale paired recordings is broadly applicable for investigating  
22 functional connectivity across brain regions, we were also able to identify retinal inputs to the avian  
23 optic tectum of the zebra finch. We found common wiring rules in mammals and birds that provide  
24 a precise and reliable representation of the visual world encoded in RGCs to neurons in  
25 retinorecipient areas.

## 26 INTRODUCTION

27 Retinal ganglion cells (RGCs) encode the visual world in over 30 parallel functional pathways  
28 (Baden et al., 2016) and send this information via axons along the optic nerve to multiple and  
29 distributed areas in the vertebrate brain (Figure 1A) (Martersteck et al., 2017). A major  
30 retinorecipient area in rodents is the superior colliculus (SC) in the midbrain (Ellis et al., 2016;  
31 Kremkow and Alonso, 2018), referred to as optic tectum (OT) in non-mammalian vertebrates. The  
32 SC is an evolutionary old brain structure that is part of the extrageniculate visual pathway  
33 (Beltramo and Scanziani, 2019) and central for visually guided behaviors (Basso et al., 2021; Isa  
34 et al., 2021). While we have learned a lot about how SC neurons process visual stimuli (reviewed  
35 in (Cang et al., 2018)), how SC neurons integrate retinal activity on a functional level *in vivo* is still  
36 largely unknown.

37 There are multiple possible mechanisms how SC neurons could integrate RGC inputs. SC  
38 neurons might be driven by sparse but strong RGC inputs (Figure 1B, top) such that individual  
39 RGCs can drive SC spiking. Alternatively, SC neurons could receive numerous but weak RGC  
40 inputs and simultaneous activation of multiple pre-synaptic RGCs is required to drive SC spiking  
41 (Fig. 1B, bottom). These two distinct wiring schemes have implications for how SC neurons  
42 represent the visual world encoded in the diverse pathways of their retinal afferents. Strong but  
43 sparse inputs would indicate that SC neurons reliably represent the activity of specific retinal  
44 pathways, comparable to the retinogeniculate circuit (Rosón et al., 2019; Usrey et al., 1998) and  
45 the somatosensory system (Deschênes et al., 2003; Xiao and Xu, 2020). In contrast, if SC spiking  
46 is driven by the summation of numerous weak inputs, SC neurons could generate new  
47 representations by combining the activity of multiple and diverse RGC types, similar to what has  
48 been reported in thalamo-cortical visual circuits (Kremkow and Alonso, 2018; Kremkow et al.,  
49 2016; Lien and Scanziani, 2018; Niell and Scanziani, 2021; Reid and Alonso, 1995). Anatomically,  
50 the spatial spread of RGC axonal arbors in SC (Hong et al., 2011) would support both of these  
51 wiring schemes and therefore it is still unresolved whether SC neurons integrate inputs from only  
52 a specific RGC type or whether they sample more broadly from a diverse set of RGC functional  
53 pathways. These circuit properties will determine how SC neurons integrate retinal activity *in vivo*  
54 and thus revealing the principles underlying the functional organization of the retinocollicular  
55 circuitry is central for advancing our mechanistic understanding of how SC neurons process visual  
56 stimuli and their role in mediating visually guided behaviors.

57 A hallmark of the retina is its organization into mosaics (Cook and Chalupa, 2000; Roy et  
58 al., 2021; Wässle et al., 1981a, 1981b, 1981c), that are present even in species with poor visual  
59 acuity like the mouse (Huberman et al., 2008). In these mosaics, RGCs of the same functional  
60 type tile the retina in a quasiregular lattice (Cook and Chalupa, 2000; Devries and Baylor, 1997;

61 Roy et al., 2021; Wässle et al., 1981a) which is thought to reflect optimal and efficient encoding  
62 of visual scenes (Field and Chichilnisky, 2007; Roy et al., 2021; Wässle et al., 1981a). If the role  
63 of neurons in the SC layers is to provide a precise representation of retinal signals to downstream  
64 processing stages (Evans et al., 2018; Lee et al., 2020; Shang et al., 2018), an important  
65 prerequisite would be that the structure of retinal mosaics is maintained with single cell precision  
66 at the output level of the retina, i.e. the RGC axons in SC, such that spatial resolution is not  
67 impaired. While it is established that retinal axons maintain an overall retinotopic organization  
68 within the SC (Cang and Feldheim, 2013), by forming dense arbors within specific locations and  
69 layers of the superficial SC (Cheng et al., 2010; Hong et al., 2011; Huberman et al., 2009;  
70 Martersteck et al., 2017), experimental evidence is lacking for how precise RGC axonal arbors  
71 reflect the spatial organization of neighboring RGC somata and dendrites within the retina, thus  
72 whether retinal axons are organized in mosaics.

73         The primary obstacle to understanding the fine scale spatial organization of RGC axonal  
74 arbors and the resulting functional connectivity is due to technical difficulties in recording RGC  
75 activity and the location of their axons simultaneously with their postsynaptic targets *in vivo*.  
76 Synaptic connectivity between progressive stages of sensory processing is typically assessed  
77 using topographically aligned recordings of somatic activity in the two regions of interest  
78 (Bereshpolova et al., 2020; Lien and Scanziani, 2018; Reid and Alonso, 1995; Usrey et al., 1998).  
79 However, this methodology has a low yield of synaptically connected neurons, often restricted to  
80 a few pairs recorded simultaneously (Liew et al., 2021; Usrey et al., 1998), which ultimately limits  
81 our understanding of how populations of afferent inputs are integrated within target circuits. Here  
82 we show that high-density electrodes overcome this technical limitation and that measuring the  
83 activity and location of RGC axons simultaneously with their postsynaptic targets in the midbrain  
84 at a large scale *in vivo* is possible. Employing this method, we investigate whether RGC axons  
85 are organized in mosaics in the midbrain, and elucidate how midbrain neurons functionally  
86 integrate those afferent inputs *in vivo*. In addition, we demonstrate that the observed wiring  
87 schemes and functional patterns are shared principles across mammals (mouse, *Mus musculus*)  
88 and birds (zebra finch, *Taeniopygia guttata*).

## 89 RESULTS

### 90 Recording afferent axons and local neurons simultaneously using high-density electrodes

91 To study the functional organization of the retinocollicular circuitry we used high-density electrodes  
92 (Neuropixels probes (Jun et al., 2017)) to record extracellular neuronal activity in the visual layers  
93 of mouse SC *in vivo*. We targeted SC with a tangential recording configuration that places  
94 hundreds of recording sites within SC (Figures 1C and S1, see Methods). We discovered that the  
95 high spatiotemporal sampling of those electrodes, together with their low noise level, allows  
96 distinguishing waveforms from somatic action potentials (APs) of SC neurons (Figure 1D, right)  
97 from axonal APs of RGC axons (Figure 1D, left; see Figure S2 for waveform classification). Both  
98 types of waveforms can be sorted (see Methods) into well isolated single unit clusters with clear  
99 refractory periods (Figure 1D, see spike train auto-correlogram “ACG”) and comparable good  
100 quality metrics such as AP amplitude and isolation distance (see Figure S3 for details). The  
101 majority of waveforms of somatic APs are biphasic and with a small spatial spread (Figure 1D,  
102 right). In contrast, the waveforms of afferent axons have a larger spatial spread (Figures 1D, left  
103 and S3) and are composed of fast bi/triphasic components caused by the axonal AP and the axons  
104 terminal responses (Swadlow and Gusev, 2000) followed by a second slower trough  
105 corresponding to the synaptically induced dendritic activity in postsynaptic SC neurons (Figure  
106 1D, left, arrows; Figure S2). Furthermore, we observed that APs propagate along an axonal path  
107 in the multi-channel waveform view (Figure 1D, left), with conduction velocities in the range  
108 reported from retinal afferents to the SC (Rhoades and Chalupa, 1979) (Figures S1G-I, mean  
109 conduction velocity =  $3.5 \pm 1.3$  m/s,  $n = 283$  RGC axons). RGC axons innervate the SC along the  
110 anterior-posterior axis (Figures 1A, 1C). Since we could observe the AP propagation only in  
111 recordings aligned with the anterior-posterior axis (Figures 1D and S1C-I) but not in recordings  
112 aligned with the medio-lateral axis (Figures S1J-M), our observations suggests that the axonal  
113 waveforms in our recordings are retinal afferents making synaptic connections onto SC neurons.  
114 To confirm this prediction, we performed a series of *in vivo* pharmacological experiments (Figures  
115 1E-1F and S4). We injected Muscimol, a GABA<sub>A</sub> receptor agonist, into the SC *in vivo* to verify that  
116 the triphasic waveforms are signals from long range axons that innervate SC. As expected, these  
117 signals were not suppressed by Muscimol application (Figure 1E, green). We then injected a  
118 synaptic blocker (see Methods) into the SC to confirm that the second negative waveform  
119 component originates from postsynaptic responses in SC neurons (Figure 1F). Finally, we applied  
120 tetrodotoxin (TTX) to the eye of the mouse to show that axonal waveforms originate from the retina  
121 and do not arise from other sources, e.g. cortex (Figure 1E, light green).

122 These results demonstrate that the triphasic waveforms recorded in the SC originate from  
123 RGC axons making synaptic contacts with SC neurons. In addition, the small distance between

124 recording sites allowed us to capture and isolate activity from neighboring RGCs that are members  
125 of the same retinal mosaic (Figures 1G and S5). These RGCs are identified by similar functional  
126 responses to a visual chirp stimulus (Baden et al., 2016), non-overlapping receptive field centers,  
127 and putative electrical coupling, evident in the double peaks in the cross-correlograms (CCG)  
128 which is a defining characteristic of coupling between same type RGCs in the retina (Mastronarde,  
129 1983) (Figures 1G and S5B/C). Being able to record from RGC axons of neighboring RGCs shows  
130 that the spatial and temporal resolution of our method is sufficient to reliably isolate individual RGC  
131 axons in the SC *in vivo*. Individual recordings yielded a high number of simultaneously recorded  
132 RGC axons (~40% of clusters) and SC neurons (~60% of clusters) (n = 27 recordings, n = 1199  
133 RGC axons, n = 1840 SC neurons). Recorded RGC axons and SC neurons covered a large region  
134 within the SC circuit and across the visual field (Figure 1H, see Figure S1), with RGC axons  
135 deriving from a diversity of functional retinal pathways (Baden et al., 2016) (Figure 1I).

136 Taken together, we show that high-density electrodes enable recording of the activity and  
137 location of afferent axonal APs simultaneously with the AP of post-synaptic targets at a large scale  
138 *in vivo*, both in anesthetized and awake mice (Figure S1N). This method thereby permits to study  
139 the spatial organization of afferent axons and the resulting functional connectivity with their target  
140 neurons *in vivo*.

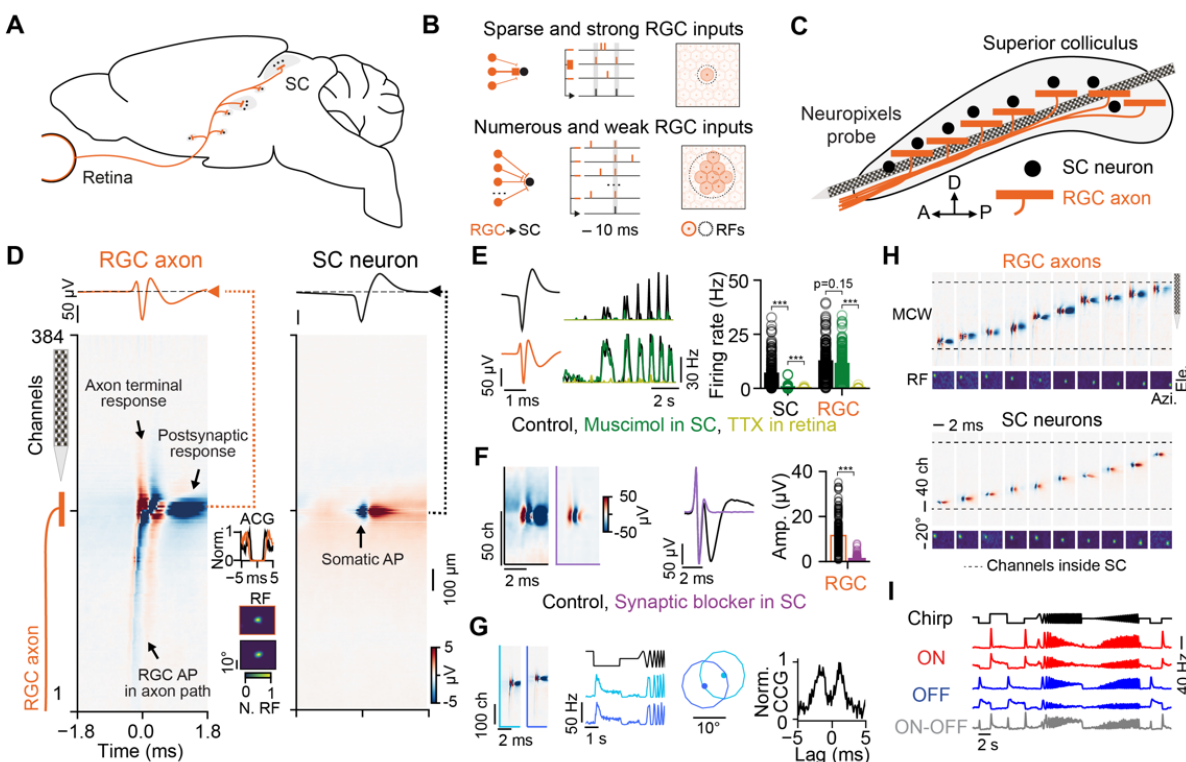

141 **Figure 1: Simultaneous recordings of RGC axons and local neurons in the mouse SC**

142 (A) Retinofugal projections in the mammalian brain. The superior colliculus (SC) is a major brain structure  
 143 of the visual system receiving afferent inputs from retinal ganglion cells (RGC), the output cells of the retina.  
 144 (B) Possible mechanisms of how SC neurons integrate RGC inputs *in vivo*. SC neurons could be driven by  
 145 sparse but strong RGC inputs (top) or by the synchronous activation of numerous weak RGC inputs  
 146 (bottom). The schematic shows the possible retinocollicular wiring (left), synaptic integration (middle) and  
 147 connection specificity (right).

148 (C) Experimental setup for simultaneous recording of RGC axons and SC neurons with high-density  
 149 electrodes (Neuropixels probes) in the mouse SC *in vivo*.

150 (D) Average spatiotemporal electrical signal of an RGC axonal action potential (AP) (left, RGC axon) and  
 151 somatic SC AP (right, SC neuron) along the Neuropixels probe. The RGC AP propagating along the path  
 152 of the RGC axon is visible in the multi-channel waveforms (MCW) together with the axon terminal response  
 153 and the evoked postsynaptic response. ACG = spike train auto-correlogram; RF = receptive field.

154 (E) Pharmacological confirmation of axonal and somatic waveforms. Left, visually evoked activity of an  
 155 example SC neuron (top) and RGC axon (bottom) during different pharmacological conditions shown in the  
 156 peri-stimulus time histograms (PSTH): control condition (black), after local Muscimol application in the SC  
 157 (green) and after injecting tetrodotoxin (TTX) in the eye (light green). Right, Average firing rates during the  
 158 different conditions (n = 5 mice, n = 224 SC neurons, n = 215 RGC axons).

159 (F) Pharmacological confirmation the second trough in RGC axonal waveforms is postsynaptic evoked  
 160 activity (n = 3 mice, n = 203 RGC axons).

161 (G) Recording from neighboring RGCs of the same functional type and RGC mosaic, identified by similarity  
 162 in visually evoked responses to a chirp stimulus (PSTH), non-overlapping RF centers and putative electrical  
 163 coupling, evident by the double peaks in the spike train cross-correlogram (CCG).

164 (H) Simultaneously recorded RGC axons and SC neurons cover a large part of the SC circuit and different  
 165 retinotopic positions. The dashed black lines enclose the recording sites located within the SC.

166 (I) Functional diversity of the recorded RGC axons identified by responses to a chirp stimulus. Shown are  
 167 PSTHs of five distinct functional RGC types: ON-transient, ON-sustained, OFF-transient, OFF-sustained  
 168 and ON-OFF. For all panels: \*\*\* = p < 0.001.

## 169 **Retinal axon mosaics**

170 A precise representation of retinal signals at the level of SC neurons would require that retinal  
171 mosaics are mapped isometrically onto the SC surface, i.e. the spatial relationship between RGCs  
172 within the retina is reproduced at the level of their axons in SC. However, whether the mosaic  
173 structure is indeed maintained with such a precision at the level of RGC axons is an open question.  
174 Addressing this issue requires relating the locations of neighboring RGCs from the same mosaic  
175 in the retina to the anatomical locations of their axonal arbors within SC *in vivo* (Figure 2A, top).  
176 The location of the RGC dendritic arbor can be estimated *in vivo* from the visual receptive field  
177 (Figure 2A, see Methods) and the anatomical location of the RGC axonal arbor can be inferred  
178 from the RGC waveform on the high-density electrode (Figures 1D/1H). In particular, the recording  
179 sites that contain the postsynaptic component of the triphasic RGC waveform (Figures 1D/F and  
180 2A bottom-right) identify the anatomical locations where the RGC axonal arbor makes synaptic  
181 contacts onto dendrites of SC neurons. We define this area on the probe as the RGC axonal  
182 synaptic contact field (AF) and use this *in vivo* measurement as a proxy for the anatomical location  
183 of the RGC axonal arbor within SC. Since the recording sites on the Neuropixels probe are  
184 organized in a checkerboard pattern with 480 rows (electrode pitch = 20  $\mu\text{m}$ ) and four columns  
185 (electrode pitch = 16  $\mu\text{m}$ ) it is possible to estimate the position and spatial extent of the AFs both  
186 along and across the probe (Figure 2A, see Method).

187 To investigate how the axonal arbors of neighboring RGCs of the same type organize in  
188 SC requires identifying RGCs belonging to the same functional mosaic. Three criteria can be used  
189 to identify RGC from the same mosaic: 1) comparing the visually evoked activity of RGCs to a  
190 chirp stimulus (Figures 1G and 2B, left); 2) comparing the polarity (ON or OFF) of the RGC visual  
191 receptive fields (Figure 2B, middle; see Methods), and 3) identifying putative electrically coupled  
192 RGCs via spike train cross-correlation (Figures 1G and S5B). High similarity in the evoked chirp  
193 responses as well as same polarity of the receptive fields indicate that RGCs are of the same  
194 functional type while putative electrical coupling further increases the confidence that these RGCs  
195 belong to the same retinal mosaic (Mastrorarde, 1989) (Figure S5). However, it is important to  
196 note that not observing electric coupling does not indicate that RGCs are from different mosaics.  
197 Having sorted recorded RGCs into functional types we studied and compared the spatial  
198 organization of their mosaics at the level of the retina using the RFs and at the level of the axon  
199 in SC using the AFs.

200 Figure 2B shows a recording in which we were fortunate to capture a large number of  
201 RGCs from a similar functional type, OFF-transient in this case (Figure 2B, left,  $n = 22$  RGCs).  
202 The AF positions of the RGCs gradually changed along the probe and within SC (Figure 2B, right)  
203 with the corresponding RF locations varying in elevation and azimuth (Figure 2B, middle).



204 Overlaying the RF of all RGCs confirmed well-known properties of retinal RF mosaics: RF centers  
205 were non-overlapping, quasiregular, and hexagonally arranged (Figure 2C, top; color-code same  
206 as in Figure 2B). Measuring the distance between RF centers (dRF) showed a clear gap at close  
207 distance (Figure 2D, black), indicative of non-overlapping RF centers. Estimating the angles  
208 between nearest neighbors in the RF mosaic, employing the Delaunay and Voronoi tessellations  
209 (Zhan and Troy, 2000) (see Methods), showed a peak around 60 deg (Figure 2E, black), which is  
210 characteristic for hexagonal organizations. Both measurements thus confirm that our method can  
211 capture RGCs belonging to the same RGC mosaic *in vivo* (Figure S5).

212 Remarkably, the mosaic organization in the retina was almost perfectly preserved at the  
213 level of the RGC axons within SC (Figure 2C, compare top and bottom). As for the RFs, the  
214 histogram of the distances between AF centers showed a clear gap at close distance (Figures 2D  
215 and S7C, gray) and the AF centers were quasiregular and hexagonally arranged (Figure 2E, gray),  
216 revealing that RGC axonal arbors are organized in mosaics (Figures 2C and S5G). To assess the  
217 geometrical similarity between the RF and AF mosaics we transformed the AF mosaic from the  
218 anatomical space in SC ( $\mu\text{m}$ ) into the visual space of the RFs (deg), by linearly scaling and rotating  
219 the AF mosaic to match the size and orientation of the RF mosaics (Figure 2F, see Methods). This  
220 transformation preserves the spatial relationship between AF centers and allows to quantify the  
221 similarity between the RF and AF mosaics. To quantify the similarity, we measured the distances  
222 between RF and AF centers of individual RGCs and divided these values by the mosaic spacing  
223 in each mosaic (mosaic spacing = median nearest neighbor's RF distance). Our results show that  
224 RF and AF centers closely overlay and align and that the RF and AF mosaics are geometrically  
225 similar (Figures 2G, median distance  $0.26 \pm 0.17$  mosaic spacing,  $n = 50$  RGCs from  $n = 7$  mosaics  
226 and  $n = 5$  mice). To further characterize the similarity, we compared the RF and AF distances  
227 between RGC pairs (Figures 2H, median  $d_{\text{RF}}/d_{\text{AF}} = 1.00 \pm 0.18$ ,  $n = 294$  RGC pairs from  $n = 7$   
228 mosaics and  $n = 5$  mice) and compared the angles within the RF and AF mosaics (Figure 2I,  
229 median  $\alpha_{\text{RF}}/\alpha_{\text{AF}} = 1.04 \pm 4.76$ ,  $n = 627$  angles from  $n = 7$  mosaics and  $n = 5$  mice). All these  
230 measurements show a close correspondence between the RF and AF centers and strongly  
231 suggest that RGC axon mosaics within SC are almost perfect copies of the RGC dendritic mosaics  
232 in the retina. Thus, on the level of single cells, RGC axons provide precise isomorphic  
233 representation of the retina as input to SC. But how do SC neurons sample from this precisely  
234 organized afferent input? To answer this question, we next studied monosynaptically connected  
235 RGC-SC pairs.

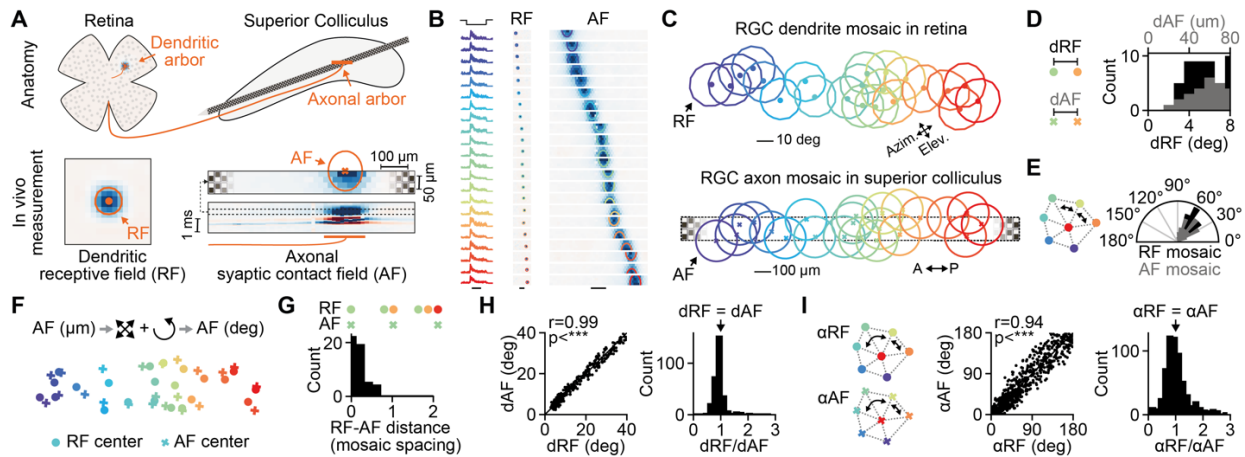

## 236 Figure 2: Retinal axon mosaics

237 (A) Characterization of RGC dendritic and axonal arbors using *in vivo* measurements. The spatial location  
 238 of the RGC dendrites can be estimated *in vivo* by mapping the visual receptive field (RF), left. The spatial  
 239 location the RGC axonal arbors in SC can be measured *in vivo* by the axonal synaptic contact field (AF),  
 240 right. The AF is the area on the high-density electrode with evoked postsynaptic responses in SC.  
 241 (B) Simultaneous measurement of RGCs belonging to the same functional mosaic. RGC functional type  
 242 was identified using a chirp stimulus (left, shown are the normalized PSTHs) and receptive field polarity  
 243 (middle). In this example RGCs were from the OFF<sub>transient</sub> type. The corresponding RFs and AFs (right) cover  
 244 a large extend of the visual field and SC tissue. The contours on the AF colormaps show the Gaussian fits  
 245 to the AF. Scale bars: 1 s, 10 deg, 100  $\mu$ m.  
 246 (C) The mosaic of the RGC dendrites in the retina (RF) and the corresponding mosaic of the RGC axons  
 247 (AF) in SC from data shown in B. Note the similarity between the mosaics at the level of the retina (RF) and  
 248 axons in SC (AF).  
 249 (D) Histogram of the distances between RF centers (dRF, bottom axis) and AF centers (dAF, top axis). The  
 250 gap at close distances is a hallmark of the quasiregular organization of retinal mosaics.  
 251 (E) Nearest neighbor angles within the RF and AF mosaics revealed by Delaunay and Voronoi tessellations  
 252 analysis. The peak around 60 deg is indicative of a hexagonal organization.  
 253 (F) Overlay of the RF/AF centers of the mosaics shown in C. For the overlay the AF mosaic was transformed  
 254 from SC space ( $\mu$ m) into visual space (deg) by scaling and rotating the AF centers. This transformation  
 255 preserves the geometrical properties of the AF mosaic.  
 256 (G) Histogram of the distances between RF and AF centers in the unit of mosaic spacing (n = 50 RGCs, n  
 257 = 7 mosaics). The mosaic spacing is the median RF distance between neighboring RGCs.  
 258 (H) Distances between RGCs in the RF and AF mosaics are similar. dRF plotted against dAF and the  
 259 histogram of the ratio between dRF and dAF (n = 294 RGC pairs).  
 260 (I) Angles between the RGCs in the RF and AF mosaics match. Angles between triples of RGCs  
 261 measured in the RF and AF mosaics (n = 627 RGC triples) and the histogram of the ration  $\alpha$ RF/ $\alpha$ AF.  
 262 Note, in E we show the angles between nearest-neighbors to test for hexagonality. In I we show the  
 263 angles across larger distances to estimate the overall geometrical similarity between the RF and AF  
 264 mosaic. For all panels: \*\*\* = p < 0.001.

## 265 **Measuring monosynaptic connectivity *in vivo* at a large scale**

266 Simultaneous recordings of RGC axons and SC neurons permit identification of synaptically  
 267 connected RGC-SC pairs. To assess synaptic connectivity, we employed established cross-  
 268 correlation analysis methods (Bereshpolova et al., 2020; Reid and Alonso, 1995) (Figures 3A/B  
 269 and S6, see Methods). Connected RGC-SC pairs were identified in the cross-correlograms by  
 270 significant transient and short-latency increases in the spiking probability (Figures 3A and S6;  
 271 peak latency =  $1.54 \pm 0.38$  ms,  $n = 1048$  connected pairs), a hallmark of monosynaptic connectivity  
 272 in vertebrate nervous systems (English et al., 2017; Jouhanneau et al., 2018; Lien and Scanziani,  
 273 2018; Reid and Alonso, 1995; Usrey et al., 1998). Unconnected pairs do not show transient peaks  
 274 (Figures 3B and S6B/C). Depending on the number of recorded RGC axons, we could identify up  
 275 to 229 monosynaptic connections in individual recordings (Figures 3C and S6), yielding in total  
 276 above one thousand measured connected RGC-SC pairs across multiple experiments (Figure 3D,  
 277  $n = 1048$  connections,  $n = 1199$  RGC axons,  $n = 32$  experiments, average probability of detecting  
 278 RGC-SC connections per RGC axon = 87%). This high number of measured connected pairs  
 279 results from the close proximity of RGC axons and SC neurons on the high-density electrode  
 280 probe (Figure 3E, left; distance within SC =  $70.63 \pm 141$   $\mu\text{m}$ ,  $n = 1048$  connected pairs) and similar  
 281 receptive field locations (Figure 3E, right, RF distance =  $4.64 \pm 4.75$  deg,  $n = 530$  connected pairs).  
 282 Due to the large number of identified connections, we were able to identify diverging connections  
 283 from single RGC onto multiple SC neurons (Figure 3F, left) and converging connections from  
 284 multiple RGCs onto single SC neurons (Figure 3F, right), permitting us to investigate the functional  
 285 organization of the retinocollicular circuit *in vivo*.

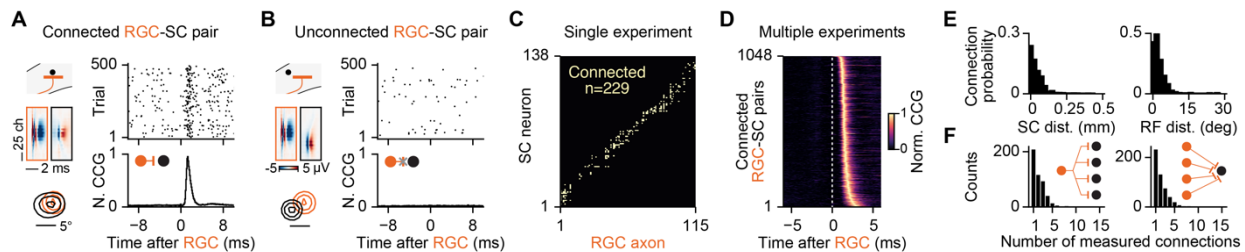

286

## 287 **Figure 3: Measuring afferent monosynaptic connections *in vivo* at a large scale**

288 (A) Examples of a monosynaptically connected RGC-SC pair. Top, raster plot of SC spiking activity triggered  
 289 on RGC spike times. Bottom, cross-correlogram (CCG) between the RGC and SC spiking activity. The short  
 290 latency peak in the CCG is a hallmark of synaptic connections in vertebrates. Note the close distance of the  
 291 RGC axon and SC neuron waveforms on the probe (middle) and the overlapping RFs (bottom).

292 (B) Unconnected RGC-SC pair. Unconnected pairs do not overlap in SC and visual space.

293 (C) Connectivity matrix between RGC axons and SC neurons recorded in a single experiment. Yellow marks  
 294 identify connected pairs. RGC axons and SC neurons are sorted by their location in SC.

295 (D) CCGs of connected pairs across multiple experiments, sorted by peak latency.

296 (E) Connection probability as a function of SC distance and RF distance.

297 (F) Number of measured RGC-SC connections per RGC axon (left) and SC neuron (right).

## 298 **Synaptic organization of the retinocollicular circuit *in vivo***

299 Previous studies have shown that single RGC spikes reliably trigger postsynaptic activity in  
300 neurons of the visual thalamus, dorsal lateral geniculate nucleus (dLGN) (Kaplan and Shapley,  
301 1984; Usrey et al., 1998), and that the majority of dLGN spikes are driven by RGC activity (Usrey  
302 et al., 1999). It is unknown, however, whether this strong drive and coupling are common principles  
303 of RGC connections and are therefore also present in the retinocollicular pathway (Figure 1B, top),  
304 or whether the retinocollicular circuit is different such that SC neurons receive weak inputs from  
305 numerous RGCs (Figure 1B, bottom). To differentiate between these distinct modes of signal  
306 transmission, we examined the activity of connected RGC-SC pairs (Figure 4). Our data shows  
307 that individual RGC APs can trigger responses in the postsynaptic SC neuron (Figure 4A, “1”) or  
308 fail to be transmitted (Figure 4A, “2”), and that SC APs can occur without input from that specific  
309 RGC (Figure 4A, “3”). To quantify these observations, we estimated the connection efficacy and  
310 connection contribution (Usrey et al., 1999) for each connected pair. The efficacy is the probability  
311 that an RGC input triggers an AP in the postsynaptic SC neuron (Figure 4B, left). In the example  
312 shown in Figures 4A-B, the efficacy was ~17% and across the population, we observed a log-  
313 normal distribution of connection efficacies, with a few very strong connections up to ~50%  
314 efficacy, but primarily weaker connections (Figure 4C, efficacy =  $4.01 \pm 4.20\%$ , maximum efficacy  
315 = 48.08%,  $n = 1048$  connected pairs). Next, we estimated the connection contribution, which  
316 characterizes the fraction of SC APs that are driven by RGC activity from a single RGC unit and  
317 therefore provides a measure for how strong SC neurons are coupled to the activity of individual  
318 RGC inputs. High contribution values indicate that SC neurons are primarily driven by their RGC  
319 afferent inputs while low contribution values reflect that SC neurons are driven by inputs from other  
320 sources. Our data show that SC neurons can be strongly coupled to retinal inputs, such that a  
321 large fraction of SC APs are preceded by retinal APs (Figure 4B, right), however we primarily  
322 observed weaker coupled pairs (Figure 4D, contribution =  $15.31 \pm 11.36$ , maximum contribution =  
323 78.63,  $n = 1048$  connected pairs). Across the population, we discovered a log-normal distribution  
324 of connection and coupling strengths. Log-normal distributions of connection strength are widely  
325 observed in the vertebrate brain (Buzsáki and Mizuseki, 2014; Cossell et al., 2015; Jouhanneau  
326 et al., 2015, 2018), including human (Campagnola et al., 2021), which could be the result of circuit  
327 refinement during development (Dhande et al., 2011) by which only a few strong connections  
328 remain after the refinement process. Our data support this view whereby RGCs establish only one  
329 or a few strong connections with SC neurons and multiple weaker connections (Figures 4E/F and  
330 S6E). Such sparse and strong connections are optimal for reliably transmitting signals along  
331 signaling pathways (Kumar et al., 2010) and suggest that the retinocollicular circuitry is optimally  
332 wired for transmitting retinal activity in a functional specific manner.

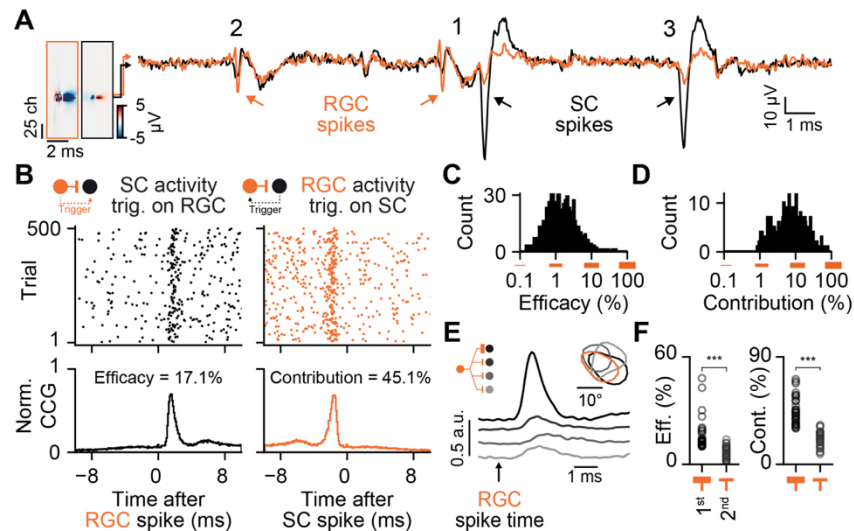

333 **Figure 4: SC neurons are strongly driven by retinal afferent inputs**

334 (A) Example traces showing the electrical signals of a monosynaptically connected RGC axon (orange) and  
 335 SC neuron (black) pair. 1) the RGC spike triggers a SC spike, 2) failed transmission, 3) SC spike without  
 336 RGC input.

337 (B) Strong RGC-SC coupling. Left, SC spiking activity relative to the RGC spike times of the example pair  
 338 shown in a. Note that the RGC input strongly drives spiking in the connected SC neuron, estimated by the  
 339 connection efficacy. Right, a large fraction of SC spikes are driven by RGC activity, estimated by the  
 340 connection contribution.

341 (C) Population histogram of efficacy values ( $n = 1048$  connected pairs). Note the log-normal distribution,  
 342 with few strong and many weak connections.

343 (D) Contribution of all measured connections ( $n = 1048$  connected pairs).

344 (E) Example of a divergent connection with one strong and several weak connections. Inset shows the  
 345 receptive field contours of the recorded neurons.

346 (F) Efficacy and contribution measurements for the strongest and second strongest connection (efficacy:  
 347 1<sup>st</sup> =  $16.52 \pm 9.08\%$ , 2<sup>nd</sup> =  $6.56 \pm 3.29\%$ ,  $p < 0.001$ ; contribution: 1<sup>st</sup> =  $45.22 \pm 11.77\%$ , 2<sup>nd</sup> =  $21.53 \pm 6.36\%$ ,  $p <$   
 348  $0.001$ ;  $n = 30$  divergent connections).

349

## 350 **Functional organization of retinal afferent connections in SC**

351 Next, we studied the functional organization of the retinal inputs to SC neurons as it is still largely  
352 unknown how SC neurons integrate convergent inputs from the diverse set of retinal functional  
353 pathways (Ellis et al., 2016). To this end, we characterized and compared the visually driven  
354 responses of connected RGC-SC pairs. We started to investigate the retinotopic alignment and  
355 functional similarity of connected RGC-SC neurons by measuring the spatiotemporal receptive  
356 field (STRF) using a sparse noise stimulus (Kremkow et al., 2016) that reliably triggers  
357 spatiotemporally organized visually evoked activity, in both RGC and SC neurons (Figure 5A, see  
358 Methods). Comparing the STRFs of connected neurons provided a first measure of their functional  
359 similarity. The similarity ( $S$ ) was estimated by the correlation coefficient between the STRFs of  
360 connected pairs. A value of 1 corresponds to STRFs that are perfectly correlated, a value of 0  
361 reflects uncorrelated STRFs. Our data reveal that RGC-SC pairs with more similar STRFs are  
362 more strongly connected (Figure 5A, compare black-gray pair vs. orange-black pair), a relationship  
363 also found across the population of connected RGC-SC pairs (Figure 5B). Another important  
364 functional property of visual neurons is their selectivity to the direction of motion. Previous work  
365 indicates that direction-selective SC neurons receive directionally tuned RGC inputs (Shi et al.,  
366 2017). However, a confirmation on the level of monosynaptically connected direction-selective  
367 RGC-SC pairs has remained pending. We compared the preferred directions (PD) of  
368 monosynaptically connected RGC-SC pairs which confirm that connected and direction-selective  
369 RGCs and their SC targets have similar preferred directions (Figures 5C/D, see Methods).

370 These results support the notion that the retinocollicular circuit is organized in a functionally  
371 specific manner, with some response features of RGC stimulus selectivity being passed on onto  
372 their respective strongest connected SC neurons. However, not all RGC types are direction  
373 selective and the distribution of similarity values from dissimilar ( $S = 0$ ) to identical ( $S=1$ ) (Figure  
374 5B), suggests that not all SC neurons receive convergent inputs from a functionally homogenous  
375 pool of RGCs, raising the question whether different functional convergence motifs exist. To clarify  
376 this issue, we extended our functional characterization by analyzing responses to a chirp stimulus  
377 that allows classifying RGCs into different functional types (Baden et al., 2016) (Figure 1I, see  
378 Methods). Studying the convergence of RGC axons to single SC neurons revealed that relay and  
379 combination motifs exist (Figures 5E/F). In relay motifs, a SC neuron receives convergent inputs  
380 from a population of RGCs of the same functional type, such that the evoked responses were  
381 similar to the presynaptic RGC pool (Figure 5E, note the similarity between receptive fields as well  
382 as evoked chirp responses of RGCs and the SC neuron). In contrast, in combination motifs SC  
383 neurons pool afferent inputs from a few but diverse set of functional RGC types (Figure 5F). We  
384 characterized the functional specificity of the convergence motifs by calculating the similarity

385 (correlation) of the chirp responses among the presynaptic RGCs (Figures 5E/F, bottom-right,  
 386 orange) and the similarity between the RGCs and the postsynaptic SC neuron (Figures 5E/F,  
 387 bottom-right, black; see Methods). Values close to 1 for both measurements reflect a relay motif  
 388 (Figure 5E) while lower values indicate a more diverse functional relationship (Figure 5F) between  
 389 the presynaptic RGCs and the postsynaptic SC neuron. Across the population of SC neurons, the  
 390 functional RGC-SC convergence follows at least two motifs with presynaptic RGC pools being  
 391 homogenous (Figure 5G, violet) or functionally diverse (Figure 5G, green).

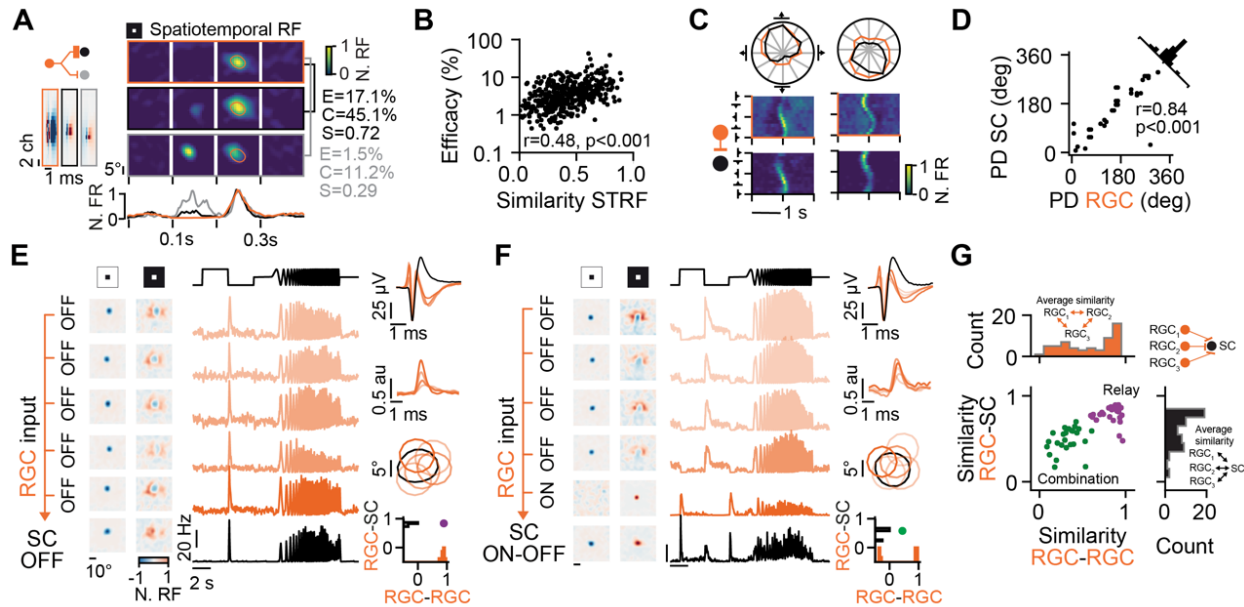

392  
 393 **Figure 5: Functional organization of the retinal afferent connections**

394 (A) Example of a divergent connection between an RGC (orange) and two of its postsynaptic targets in SC  
 395 (black and gray). Shown are the spatiotemporal receptive fields (STRF, top), and the temporal response at  
 396 fine temporal scale (bottom). E = efficacy, C = contribution, S = similarity of the STRFs.  
 397 (B) Correlation between the similarity of STRFs and connection efficacy (n = 530 connected pairs).  
 398 (C) Directional tuning of connected RGC-SC pairs. Top, polar plot indicating overlapping directional tuning  
 399 of connected pair (orange and black). Bottom, normalized firing rate in response to moving bars.  
 400 (D) The preferred directions (PD) of RGC axons and their connected postsynaptic SC target neurons match  
 401 (mean PD difference =  $24.23 \pm 29.15^\circ$ , n = 50 connected pairs).  
 402 (E) Relay motif example of an SC neuron receiving convergent inputs from a pool of RGCs with similar  
 403 functional responses. Left, receptive fields. Middle, responses to the chirp stimulus. Right, spike waveforms,  
 404 CCGs, contours of RFs, histogram of similarities between RGC-RGC (orange) and RGC-SC (black).  
 405 (F) Combination motif example, same format as e. Both ON and OFF RGCs converge onto the SC neuron.  
 406 (G) Functional convergence, population analysis. Top, histogram of the average RGC-RGC correlations of  
 407 convergent pools. Note that some afferent input pools are highly correlated with values close to 1 while  
 408 others convey a mixed input with values close to 0.5. Right, histogram of the average RGC-SC correlation.  
 409 Scatter plot of the average RGC-RGC similarity vs. the average RGC-SC similarity for SC neurons with  $\geq$   
 410 3 RGC inputs. Note both relay motifs (violet) and combination motifs (green) across the population of SC  
 411 neurons (n = 57 SC neurons, n = 27 recordings).

## 412 **Comparing the mammalian and avian retinotectal circuit**

413 Our data demonstrate that the synaptic and functional organization of the retinocollicular pathway  
414 of the mouse is characterized by sparse and strong connections that establishes functional  
415 specific wiring between retina and SC. Since the retinofugal pathway to the midbrain is highly  
416 conserved across all classes of vertebrates (Basso et al., 2021), we hypothesized that these wiring  
417 principles are of general nature and therefore likely to be found in non-mammalian vertebrate  
418 species, e.g. birds. To test this hypothesis, we studied the synaptic and functional organization of  
419 retinal afferent inputs to neurons in the optic tectum of the zebra finch employing our high-density  
420 electrode method to simultaneously measure RGC axons and connected OT neurons *in vivo*  
421 (Figures S7/8). Our data confirms that RGC axons form mosaics in the OT of the zebra finch that  
422 precisely reflect the mosaic at the RF level in the retina (Figures 6B/C and S7G-K, finch: median  
423  $dRF/dAF = 1.01 \pm 0.28$ ,  $n = 55$  RGC pairs; median  $\alpha_{RF}/\alpha_{AF} = 1.04 \pm 1.14$ ,  $n = 155$  angles). Similar  
424 to the mouse SC, zebra finch OT neurons receive a limited pool of RGC afferents (Figures 6D and  
425 S8F) with a log-normal distribution of RGC connection strengths (Figures 6D and S8B). As a  
426 consequence, OT neurons are strongly driven and tightly coupled to their RGC afferent inputs  
427 (Figures 6E and S8, finch: efficacy =  $7.16 \pm 7.16\%$ , maximum efficacy = 39.26%, contribution =  
428  $13.36 \pm 11.73\%$ , maximum contribution = 58.83%,  $n = 105$  connected pairs), which establishes a  
429 precise retinotopic representation of retinal activity in OT/SC neurons (Figure 6F) and functional  
430 specific wiring (Figures 6G and S8D,  $r = 0.69$ ,  $p > 0.001$ ,  $n = 53$  connected pairs). Despite the  
431 higher spatial resolution of the avian visual system (Schmidt et al., 1999) and the large  
432 evolutionary distance between mammals and birds, our results indicate that retinal afferents are  
433 integrated by zebra finch OT neurons following similar principles to neurons in the mouse SC  
434 (Figures 6 and S7/8). Taken together, our data strongly support the notion that retinotectal circuit  
435 follows similar wiring principles across vertebrate species.



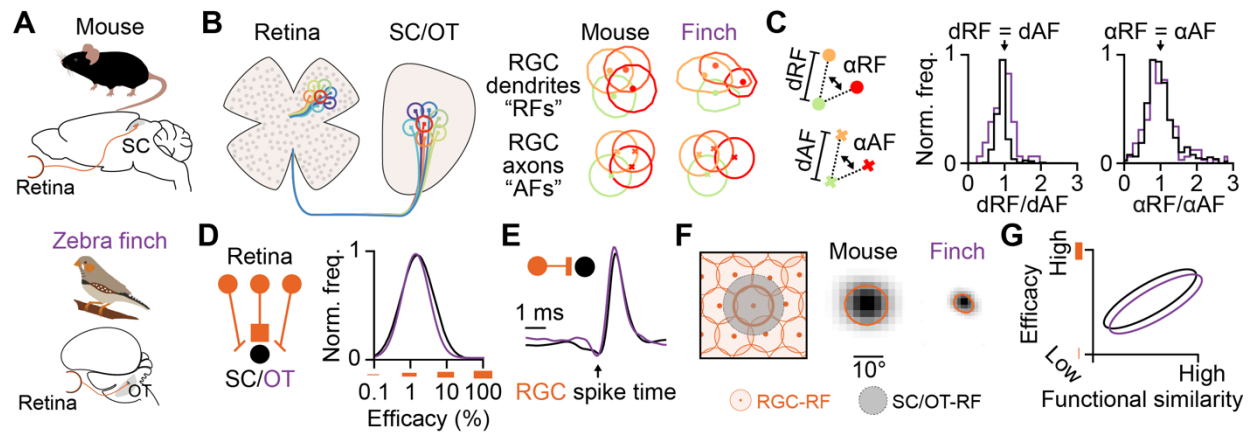

436 **Figure 6: Wiring principles of the retinotectal circuit in mammals and birds**

437 (A) Retinotectal pathway in mammals and bird. The mouse superior colliculus (SC) and the zebra finch optic  
 438 tectum (OT) receive direct inputs from retinal ganglion cells (RGC), the output cells of the retina.  
 439 (B) Retinal axons are organized in mosaics in SC/OT that reflect the mosaic organization in the retina.  
 440 Shown are examples of a RGC RF and AF mosaic from mouse and finch.  
 441 (C) The RGC axon mosaics provide a single cell precise isomorphic representation of the RGC RF mosaics  
 442 as input to the SC/OT, evident by the similarity in distances and angles between RF and AF centers.  
 443 Distances:  $n = 294$  RGC pairs in the mouse and  $n = 92$  RGC pairs in the finch. Angles:  $n = 627$  RGC triples  
 444 in the mouse and  $n = 199$  RGC triples in the finch). Note, the mouse data is also shown in Figures 2H/I and  
 445 shown here again to allow a comparison with the finch data.  
 446 (D) Limited convergence in the retinotectal circuit. RGC provide sparse but strong inputs to SC/OT neurons,  
 447 established by a log-normal distribution of connection efficacies in both vertebrate species.  
 448 (E) Individual RGC inputs strongly drive SC/OT spiking. Average cross-correlograms of connected RGC-  
 449 SC pairs ( $n = 1048$  connected pairs) and of connected RGC-OT pairs ( $n = 105$  connected pairs).  
 450 (F) Precise retinotopic convergence. Average receptive field of SC/OT neurons (grayscale colormap) and  
 451 their RGC afferents (orange contour) ( $n = 444$  RGC-SC pairs;  $n = 47$  RGC-OT pairs).  
 452 (G) Schematic of the functional specificity of RGC-SC and RGC-OT connections. See Figures 5B and  
 453 S8D for experimental results.

454 **DISCUSSION**

455 **Large scale paired recordings with high-density electrodes *in vivo***

456 We have identified a novel approach to study the functional connectivity across brain regions *in*  
457 *vivo* by using high-density electrodes recordings to capture the electrical activity of both afferent  
458 axons and the somatic activity of local neurons simultaneously on the same probe. Revealing the  
459 functional composition of presynaptic pools (Wertz et al., 2015), including afferent connections,  
460 has been technically challenging, as it requires recording with multiple carefully aligned electrodes  
461 in the afferent and target brain region (Bereshpolova et al., 2020; Lien and Scanziani, 2018; Liew  
462 et al., 2021). High-density electrodes solve this issue by recording the activity of afferent axons  
463 and their postsynaptic target neurons simultaneously on nearby channels on the same probe  
464 (Figures 1D and 3A/E), thereby yielding an unprecedentedly large number of connected pairs *in*  
465 *vivo* (Figures 3C/D). The continuously increasing number of recording sites and reduction in site-  
466 to-site distance (Steinmetz et al., 2021) of high-density electrodes, together with a growing  
467 applicability of these probes for chronic recordings, will open up the possibility to study the  
468 functional connectivity between connected brains regions in freely behaving animals.

469

470 **Synaptic contact fields of afferent axons**

471 Revealing the functional properties of afferent axons and how those axons organize within target  
472 structures is central for reaching a mechanistic understanding of functional neural circuits. Our  
473 novel method of measuring the axonal synaptic contact field of afferent axons, on the two-  
474 dimensional layout of the high-density electrode *in vivo*, opens up opportunities to investigate the  
475 principles of how afferent inputs organize in other parts of the brain, e.g. how thalamic afferents  
476 organize within sensory cortices (Jin et al., 2011; Kremkow and Alonso, 2018; Kremkow et al.,  
477 2016). Furthermore, our work demonstrates that it is feasible to measure and characterize sub-  
478 compartments of afferent connections *in vivo*, including synaptically evoked dendritic responses  
479 in postsynaptic neurons (Swadlow and Gusev, 2000), on a single high-density electrode (Figure  
480 1D). Previous work using spike triggered field potentials revealed important insights about the  
481 functional and synaptic properties of thalamocortical (Bereshpolova et al., 2020; Jin et al., 2011;  
482 Stoelzel et al., 2008; Swadlow and Gusev, 2000; Swadlow et al., 2002) and corticocollicular  
483 circuits (Bereshpolova et al., 2006). However, these studies required technically challenging  
484 paired recordings with well aligned electrodes in both brain regions. Our approach overcomes this  
485 technical challenge by measuring the action potential and location of the afferent axon together  
486 with the evoked synaptic field simultaneously on the same probe. Moreover, recent work using  
487 planar high-density electrodes showed that it is possible to characterize connectivity and function  
488 using extracellular electrodes in *ex vivo* preparations (Shein-Idelson et al., 2017). Our study now

489 shows that high-density electrodes can be used for studying synaptic physiology of afferents *in*  
490 *vivo*, which opens up new avenues in how to probe both function and structure of neural circuits;  
491 including the plasticity of afferent synaptic inputs. Finally, high-density electrodes could potentially  
492 be used to refine models of the origin of local field potentials (Hagen et al., 2017) by relating  
493 afferent synaptic inputs to ongoing local field potentials in cortical and sub-cortical brain structures  
494 in future studies.

495

#### 496 **Retinal axon mosaics**

497 Retinal mosaics are one of the most spatially precise organizations in the vertebrate brain (Field  
498 and Chichilnisky, 2007; Roy et al., 2021; Wässle et al., 1981a). However, whether the mosaic  
499 structure is unique to the input level of the retina (RGC dendrites) or also maintained at the output  
500 level or the retina (RGC axons) has been an open question since the discovery of retinal mosaics  
501 more than 170 years ago (Cook and Chalupa, 2000; Hannover, 1843). Our experimental data  
502 show an extraordinary correspondence between the spatial organization of the retina at its input  
503 (dendrites) and its output (axons). Retinal axons form mosaics that isomorphically and with single  
504 cell precision represent the spatial organization of the retina as input to the superficial layers of  
505 the midbrain. While the isomorphic representation of the retinotopic map on a larger scale is a  
506 known hallmark of the visual system (Cang and Feldheim, 2013), the single cell precision of this  
507 mapping at the level of the RGC axons in the midbrain has not been shown before. Furthermore,  
508 while RGC axons innervate the visual layers of the mammalian SC from below (Cang and  
509 Feldheim, 2013; Huberman et al., 2008), RGC axons in the avian visual system grow into the OT  
510 from the outside of the most superficial layers (Schmidt et al., 1999). Despite these anatomical  
511 differences on the macroscopic level, the fine scale organization of the RGC axons within the  
512 target layers of the midbrain and the resulting functional connectivity appears to be comparable  
513 between mammals and birds. This strongly suggests that the highly precise wiring of the  
514 retinotectal circuitry that we discovered is essential for visually guided behaviors in vertebrates. It  
515 also raises the question what developmental mechanisms underlie this single cell precise mapping  
516 between the retina and the midbrain and whether this precision is unique to vision or a general  
517 principle of how sensory afferents organize in the midbrain (Benavidez et al., 2021; Drager and  
518 Hubel, 1976). Finally, sensory cortices are topographically organized (Kremkow and Alonso,  
519 2018) and identifying similarities and differences in the mapping of afferents into the midbrain and  
520 cortex will provide important insights into the role these circuits play for mediating perception and  
521 behavior.

## 522 **Functional organization of the retinotectal circuit**

523 We characterized the functional organization of the retinotectal connections in both the  
524 mammalian and avian visual systems. Our results show that retinotectal wiring is governed by  
525 limited functional convergence, precise retinotopic and functional specificity and strong efficacy  
526 (Figure 6). The strong drive from RGC axons onto SC/OT neurons, together with the limited  
527 convergence, suggests that a major role of the retinotectal connections is to provide a faithful  
528 representation of the visual world to postsynaptic first order SC neurons, so that downstream  
529 neurons and circuits (Evans et al., 2018; Lee et al., 2020; Reinhard et al., 2019; Shang et al.,  
530 2018), have a reliable access to the sensory environment encoded in diverse retinal pathways  
531 (Baden et al., 2016; Savier et al., 2019). This efficient way of integrating afferent inputs is  
532 reminiscent to the way neurons in the visual thalamus (dLGN) integrate retinal inputs (Rosón et  
533 al., 2019; Usrey et al., 1999), but it is contrasting to the thalamocortical system in which thalamic  
534 afferent inputs to excitatory neurons in cortex are weak (Bruno and Sakmann, 2006; Lien and  
535 Scanziani, 2018; Reid and Alonso, 1995). Thus, the main brain regions involved in visual  
536 processing, midbrain and visual cortex, integrate their afferent inputs in different ways, suggesting  
537 distinct roles in sensory processing and visually guided behaviors.

538 We also observed combination mode motifs and it is still unresolved what determines  
539 whether an SC/OT neuron receives functionally specific or diverse afferent inputs. One possibility  
540 is the downstream targets of the postsynaptic SC/OT neuron (Reinhard et al., 2019). Another  
541 possibility is the location within the SC/OT circuit, or the cell type of the SC/OT neuron since it is  
542 known that excitatory and inhibitory neurons in visual cortex receive different types of functional  
543 convergence from thalamus (Alonso and Swadlow, 2005; Bereshpolova et al., 2020). Despite the  
544 evidence that SC neurons can inherit directional tuning from their RGC afferents (Shi et al., 2017),  
545 several response properties of SC neurons cannot be explained by simple inheritance from the  
546 retina. For example, SC neurons can be orientation selective (Ahmadlou and Heimel, 2015;  
547 Feinberg and Meister, 2015; Ito et al., 2017; Wang et al., 2010) with a wide range of orientation  
548 preferences present across the population (Ahmadlou and Heimel, 2015; Wang et al., 2010).  
549 While some orientation tuned RGC types have been reported, those RGCs mainly encode the  
550 cardinal orientations (Nath and Schwartz, 2016) and thus, inheritance alone cannot fully explain  
551 orientation preference in SC. A potential additional mechanism could be the convergence of  
552 untuned ON- and OFF-center RGCs at the level of SC neurons, similar to the way cortical neurons  
553 generate orientation preference from the convergence of ON- and OFF-center dLGN neurons (Jin  
554 et al., 2011; Kremkow et al., 2016). However, this hypothesis needs to be thoroughly investigated  
555 in future work.

556           Neurons in vertebrate visual circuits, including SC, are often organized in functional maps  
557 (Ahmadlou and Heimel, 2015; Feinberg and Meister, 2015; Kremkow and Alonso, 2018; Li et al.,  
558 2020) (but see (Chen et al., 2021)) that are thought to arise, at least in part, due to the spatial  
559 organization of the afferent inputs. While a number of studies have addressed how thalamic  
560 afferents shape the functional organization of the primary visual cortex (reviewed in (Kremkow  
561 and Alonso, 2018)) it remains an open question how the functional maps in SC relate to the spatial  
562 organization of the retinal afferents. Modeling work suggests that the moiré interference between  
563 ON- and OFF-center RGCs mosaics (Paik and Ringach, 2011) plays a major role in establishing  
564 the functional maps in the thalamocortical visual system. While experimental evidence supporting  
565 this hypothesis is still sparse, in large part due to the technical inability to map the organization of  
566 retinal mosaics via the thalamus to primary visual cortex *in vivo*, the high-density electrode  
567 approach would allow to investigate how RGC mosaics relate to the functional map in SC.

568

## 569 **SUMMARY**

570 In summary, we show that the retinotectal circuit in both mammals and birds is characterized by  
571 limited functional convergence with strong and specific connections, established in log-normally  
572 distributed connection strength. This precise functional wiring is made possible by single cell  
573 precise isomorphic mapping of retinal mosaics to the axonal input level in the midbrain. Because  
574 the functional organization of the retinotectal circuit is similar in mammals and birds and resembles  
575 the organization principle of retinal inputs to visual thalamus in mammals (Kaplan and Shapley,  
576 1984; Rosón et al., 2019; Usrey et al., 1998), we conclude that retinofugal connections follow a  
577 canonical wiring pattern that provides a precise and reliable representation of the visual world to  
578 neurons across the different targeted regions in the vertebrate brain.

579

## 580 **ACKNOWLEDGEMENTS**

581 We thank J-M. Alonso, J. Poulet, B. Judkewitz for helpful discussions and materials exchanges  
582 during the project; P. Wisinski-Bokinić, C.J. Whitmire and J-M. Alonso for comments on the  
583 manuscript; T. Leva, and P. Schnepel for help with the Neuropixels recordings; Fabian Heim for  
584 zebra finch histology; J. Siegle and D. Denman for help with software (OpenEphys) and setup;  
585 and J. Colonell for Neuropixels hardware explanations. We thank the whole Neuropixels  
586 community for their equipment and support and the Allen Institute for Brain Science for fostering  
587 high quality databases. This work was supported by the DFG Emmy-Noether grants KR 4062/4–  
588 1 (JK) and VA 742/2 (DV), the ERC-2017-StG - 757459 MIDNIGHT (DV) and Project number  
589 327654276 – SFB 1315.

590

591 **AUTHOR CONTRIBUTIONS**

592 J.S. and J.K. conceived and designed the study; J.S., C.G., J.B., D.V. collected the data; J.S.,  
593 C.G., H.B., T.L., K-L.T. and J.K. analyzed the data and J.S. and J.K. wrote the manuscript with  
594 inputs from all authors.

595

596 **DECLARATION OF INTERESTS**

597 The authors declare no competing interests.

598

**MATERIALS AND METHODS**

599 **Animals, surgery, and preparation.**

600 All experiments were pursued in agreement with the local authorities upon defined procedures  
601 (LAGeSo Berlin - G 0142/18 and Regierungspräsidium Oberbayern - ROB-55. 2-2532. VET\_02-  
602 18-182). During all experiments, maximum care was taken to minimize the number of animals  
603 used and their discomfort. *Mice*: Adult male mice (C57BL/6J) from the local breeding facility  
604 (Charité-Forschungseinrichtung für Experimentelle Medizin, n = 70) and Charles-River Germany  
605 (n = 25) were used. Induction was achieved with isoflurane (2.5% in oxygen Cp-Pharma  
606 G227L19A). Once anesthetized, the surgery was performed in a stereotactic frame (Narishige)  
607 with a closed-loop temperature controller (FHC-DC) for monitoring the animal's body temperature.  
608 The isoflurane level was gradually lowered during surgery (0.7-1.5%) while ensuring a complete  
609 absence of vibrissa twitching or responses to tactile stimulation. During surgery, the eyes were  
610 protected with eye ointment (Vidisc). For awake mouse recordings, the head post was implanted  
611 two weeks before the recording day and protected with silicone elastomer sealant Kwik-Cast (WPI  
612 Germany). Metamizole (200 mg/kg, Zentiva-Novaminsulfon) was administered in drinking water  
613 after head post implantation for a recovery period of 3 days. After recovery, the animals were  
614 gradually habituated to the recording setup. Craniotomy was performed on the day before the  
615 recording. *Zebra finches*: Adult male zebra finches (>180 days post-hatching) were obtained from  
616 the local breeding facility at the Max Planck Institute for Ornithology in Seewiesen (n = 7). Birds  
617 were anesthetized with isoflurane (1-3% in O<sub>2</sub>) and head-fixed in a stereotactic instrument (Kopf)  
618 while the body temperature was maintained at 40 °C with a homeothermic monitoring system  
619 (Harvard Apparatus) with the head tilted by 45 deg to the azimuthal plane. For all experiments, a  
620 dental cement-based crown (Paladur, Kuzler) was used to fix the head post, and grounding which  
621 settings had to be planned for each desired implantation's angle to maximize room for probe  
622 manipulations. *Recordings*: On the recording day for both, awake (mice) and anesthetized (mice  
623 and zebra finches) recordings, the probe was lowered (>4 mm) in the target region according to

624 the stereotactic coordinates, followed by a small withdrawal of 20 to 50  $\mu\text{m}$  to release accumulated  
625 mechanical pressure. Once the probe was positioned it was allowed to settle for ~10-20 minutes,  
626 receptive fields (RF) were mapped based on their multi-unit-activity (MUA) to confirm that the  
627 visual stimulus covered the retinotopic positions of the recorded neurons. Therefore, it was crucial  
628 to align the stimulus center to the pupil resting position i.e., 64 deg lateral to the nose of the mouse  
629 (Sterratt et al., 2013) and 62 deg lateral to the beak of the finch (Bischof, 1988). Once the visually  
630 driven activity was obtained on at least 50 channels (Figure S1), the data acquisition was started  
631 and visual stimuli were presented. *Histology*: For histological confirmation and reconstruction of  
632 the electrode track, the probe was removed and re-inserted in the same location coated with Dil  
633 (Abcam-ab145311) diluted in ethanol. The animal was then sacrificed either with isoflurane (>4%)  
634 or a subcutaneous injection of a Ketamine-Xylazine mix (Ketamidol 1 g/mL, Rompun 2%). Cardiac  
635 perfusion was performed with phosphate buffer saline solution (PBS) followed by 4%  
636 paraformaldehyde (PFA) in PBS. The brains were post-fixed overnight in 4% PFA and stored in  
637 PBS until histological slicing was performed using a vibratome (Leica VT1200 S) and the slices  
638 were mounted in DAPI-Fluoromount-G (70-100  $\mu\text{m}$  slices, Biozol Cat. 0100-20). Perfused zebra  
639 finch brains were transferred to 15% sucrose in PBS for 24 hours post-fixation, and once no longer  
640 buoyant, they were moved into 30% sucrose until sinking point. Optic tectum was sliced into 90  
641  $\mu\text{m}$  sagittal sections and mounted using DAKO (Agilent).

642

### 643 **Electrophysiological recordings**

644 Neuropixels probes, Phase 3a and Phase 3B1 (Jun et al., 2017), were used with Open Ephys  
645 software ([www.open-ephys.org](http://www.open-ephys.org)) on either the phase 3A system or the PXIe system (National  
646 Instrument NI-PXIe-1071). The signal was amplified and stored in both the local field potential  
647 band (LFP, high pass-filtered 0-300 Hz) or the action potential band (AP, 300 Hz to 3 kHz). All  
648 stereotactic coordinates were characterized according to their distance to lambda, either in the  
649 medio-lateral (ML), dorso-ventral (DV), or antero-posterior (AP) axis. All angles and coordinates  
650 were recorded in reference to the azimuthal plane at lambda (Paxinos and Franklin, Nixdorf 2007  
651 stereotaxic). The Neuropixels probe was inserted either tangentially in the superior colliculus (SC)  
652 from the back (Figures S1C-F, antero-posterior insertion (API): 15 to 25 deg, 500 to 1200  $\mu\text{m}$  ML,  
653 -100 to -500  $\mu\text{m}$  DV) or from the side (Figures S1J-M, medio-lateral insertion (MLI): 20 deg to 30  
654 deg, -100 to -500  $\mu\text{m}$  DV, 0 to 900  $\mu\text{m}$  AP) (Sibille et al., 2021). In the zebra finch, insertion was  
655 performed at 40 deg (Figures S7A-D, in reference to lambda: 3000 to 3800  $\mu\text{m}$  ML, -4250 to -  
656 5000  $\mu\text{m}$  DV, 4000 to 4800  $\mu\text{m}$  AP).

657

658

## 659 **Pupil tracking**

660 To monitor pupil position and dilation in awake recordings, we captured the contralateral eye on a  
661 camera (Basler acA 1300) equipped with a zooming lens (850 nm bandpass filter, ThorLabs) using  
662 a custom written pupil tracking software. The eye was illuminated with an infrared light source  
663 (ThorLabs LZ1-10R602). To avoid interference between the camera with the visual stimulus, eye  
664 tracking was performed via a dichroic mirror (Semrock, FF750-SDi02-25x36) that was placed  
665 between the eye of the animal and the stimulus screen. The pupil size and position were extracted  
666 via DeepLabCut (Mathis et al., 2018) and analyzed using custom-written scripts in Python (Figure  
667 S1N/O).

668

## 669 **Visual stimulations**

670 Visual stimuli were generated in Python using the PsychoPy (Peirce, 2008) toolbox. The visual  
671 stimuli were displayed on either a calibrated screen (Dell, refresh rate = 120 Hz, mean luminance  
672 = 120 cd/m<sup>2</sup>, for the pharmacological recordings, n = 9, Figures 1 and S4, for the awake  
673 recordings, n = 3, Figure S1, and half of the recordings in finches) or a calibrated and warped  
674 projector image (EPSON projector, refresh rate = 60 Hz, mean luminance = 110 cd/m<sup>2</sup>). This latter  
675 projector image was reflected into a plastic spherical dome screen (EBrilliantAG, IP44, diam = 600  
676 mm) upon a plexiglass reflecting half bowl (Modulor, 0260248). A layer of broad-spectrum  
677 reflecting paint was previously applied inside the plastic dome (Twilight-labs). Calibration of the  
678 dome warping was done with the Meshmapper software (Paul Bourke). The projector image  
679 covered an area of 180 deg \* 110 deg which could be re-positioned laterally. We presented the  
680 sparse noise visual stimulus on a grid of 36x22 squares with a grid resolution of 5 deg. The sparse  
681 noise targets were either dark (on light background) or light (on dark background). We presented  
682 three different sparse noise target sizes (5, 10 and 15 deg with respectively [n\_target per frames,  
683 n\_trial per positions] = [6,50], [4,30], [2,20]). Every sparse noise target was displayed for 100 ms.  
684 We also presented moving bars (white bars on black background, 10 deg in size, 24 directions,  
685 fixed speed of 90 deg/s), chirp stimulus (full-field). The timings of the visual stimuli were marked  
686 by stimulus-locked synchronizing signals.

687

## 688 **Pharmacological applications**

689 In the pharmacological experiments, the visual cortex was removed during surgery to avoid any  
690 direct visually driven corticotectal activity in the SC. The injector (Drumond, Nanoject II) was  
691 inserted vertically in the top part of the SC before recording, to decrease movement-related  
692 artifacts (lambda: 500 to 1000 µm ML, 200 to -200 µm AP, 1100 to 1400 µm DV). Approximately  
693 250 nL of different pharmacological cocktails were injected (Figure S5B). Cholera Toxin subunit



694 B, Alexa 488 Conjugate (C22841, Invitrogen) was added to the muscimol solution (Abcam,  
695 ab120094, 2.5 mM in PBS). Dextran (Fluorescein, 10,000MW, anionic, D1821) was used in the  
696 synaptic blocker mix (Muscimol, NBQX Biozol-HB0443, and D-AP5 Biozol-HB0225 at 2.5 mM, 2.5  
697 mM, 5 mM, respectively, in PBS). Muscimol was injected and allowed to diffuse for 5 minutes  
698 before the same stimulus set was repeated. In the successful double-injections pharmacological  
699 experiments (n=3/6), first, the injector was removed slowly during the Muscimol period and then  
700 the injector's solution was exchanged with the mixture of synaptic blockers and replaced carefully  
701 in a similar location for the second injection (Figure S4). A last repeat of the stimulus presentation  
702 followed at the end. Finally, at the end of all pharmacological experiments, a small volume of TTX  
703 (~ 15  $\mu$ L, Biozol-HB1034, 100  $\mu$ M in PBS) was applied in the contralateral eye to abolish all  
704 remaining visually-driven retinal activity.

705

## 706 **Data analysis**

707 Data analysis was performed in Python ([www.anaconda.com](http://www.anaconda.com)) except for Kilosort2 (KS2  
708 (Pachitariu et al., 2016)), a MATLAB ([www.mathworks.com](http://www.mathworks.com)) package for spike sorting  
709 electrophysiological data, all clusters were manually cured in Phy2. Statistical tests were  
710 performed with the Wilcoxon rank-sum test for unpaired samples and with the Wilcoxon signed-  
711 rank test for paired samples. Population results are indicated as mean $\pm$  standard deviation if not  
712 stated otherwise.

713

## 714 **Multi-unit activity extraction**

715 For MUA analysis, the common average reference was applied to the AP band bandpass filtered  
716 (Butterworth filter order 2, 0.3 to 3 kHz), where each event is extracted using custom-made Python  
717 scripts. Spike detection was performed for each channel independently at a threshold of 4  
718 standard deviations of the AP band (double side detection).

719

## 720 **Spike sorting**

721 Kilosort2 (KS2, <https://github.com/MouseLand/Kilosort>) was used for spike sorting to produce  
722 isolated single-unit clusters followed by manual curation using Phy2 (<https://github.com/cortex-lab/phy>). Double-counted spikes were removed for each cluster (within  $\pm 0.16$  ms (Siegle et al.,  
723 2021)). Furthermore, between-unit overlapping spikes which produce above chance zero-lag  
724 peaks in the cross-correlograms (CCG, peak windows  $\pm 0.5$  ms) were re-evaluated individually in  
725 Phy2 to either refine or drop the problematic cluster(s). Inter-spike-interval (ISI) violations were  
726 calculated as the ratio of the spikes within the refractory period ( $\pm 1.5$  ms) to the total number of  
727 spikes. Units with ISI > 0.05% were removed. Furthermore, isolation distance was used as another  
728

729 quality metric to guarantee well isolated clusters (isolation distance > 10 a.u, Figure S3). Other  
730 quality metrics, e.g. silhouette score, were calculated using the ecephys spike sorting pipeline  
731 ([https://github.com/AllenInstitute/ecephys\\_spike\\_sorting](https://github.com/AllenInstitute/ecephys_spike_sorting)). We included single unit clusters in the  
732 analysis that remained stable over the recording duration.

733

### 734 **Waveform classification**

735 A waveform classification approach was applied to distinguish action potentials from neurons in  
736 the vicinity of the Neuropixels probe. For each single-unit cluster, we calculated the multi-channel  
737 waveform (MCW) by spike-triggered averaging the raw AP signal on all available spike times (up  
738 to 50 000 spike times  $\pm 10$  ms time window), following an offset correction for each channel. The  
739 MCW is therefore the spatiotemporal profile of the AP signals. Afferent axons and somatic signals  
740 could be classified based on their distinct waveform (Figure 1D) which allowed us to classify all  
741 clusters into afferent axon AP vs somatic AP. We used a two-step approach for this classification.  
742 First, a custom-written graphical-user-interface (GUI) was used to manually label the cluster. This  
743 GUI was based on (1) the characteristic presence of axonal and dendritic negative peaks within 3  
744 ms (Figure S2), and (2) the possible presence of the axonal path in API (Figures S1E-G). In a  
745 second step, we compared our manual classification to an automatized classification using a  
746 Gaussian mixture model (GMM) on a principal component projection of classical waveform  
747 features (Figure S2A). Using the MCW, the spatial spread of interest ( $\Sigma$ ) was estimated by the  
748 number of neighboring channels with amplitudes >15% of the cluster maximum at the best channel  
749 (BC). This window was interpolated (101 times), smoothed (Gaussian blur 0.1 ms), time-sliced  
750 (pre-trough period of 0.6 ms and post-trough period of 3 ms), re-normalized and trough-aligned  
751 for more reliable classification. All slope measurements were defined as the 80<sup>th</sup> percentile values  
752 of the observed peaks. All 14 features measures were averaged across the channels of the  
753 defined spatial spread (Figure S2B). Additionally, a smaller portion of the obtained axonal clusters  
754 from KS2 was detected on their putative dendritic responses (Figure S2D, right). These clusters  
755 were discarded as their detection occurred on the postsynaptic dendritic responses of SC neurons  
756 and not on the action potential of the retinal axons.

757

### 758 **Detecting afferent axons in Neuropixels datasets**

759 The available default waveform plots generated by KS2 can be used to identify afferent axonal  
760 waveforms. To do so, the waveforms plotted in `make_fig.m` should be sorted based on the value  
761 of their second trough at 1.5 ms (from the standard 2.73 ms time window KS2 works with).  
762 Consequently, a five minutes long recording would be sufficient to assess whether the given  
763 insertion captures afferent axonal waveforms. During curation, the rejection criteria such as

764 “multiple spatial peaks” and “too large spread” (Siegle et al., 2021) should be minimized to  
765 increase the chances of identifying axonal waveforms from the dataset.

766

### 767 **Afferent axon conduction velocity**

768 Our method allows the recording of AP signals traveling along the afferent axonal path in the multi-  
769 channel waveform and therefore we could estimate the conduction velocity of the AP. Due to the  
770 design of the analog-digital conversion of the Neuropixels probe, we had to incorporate an  
771 interpolation step before estimating the conduction velocity from the MCW. Briefly, a time  
772 correction between adjacent channels was performed to compensate for the serial delay of 2.78  
773  $\mu$ s between two consecutive channels within each analog-digital converter (personal  
774 communication with J. Colonell). Axonal conduction velocity was then estimated on the corrected  
775 MCW using a minimal window of 8 channels below the BC (4 channels for zebra finch data) and  
776 10 channels above the tip of the Neuropixels probe. The time of the action potential in the axonal  
777 path (-2.5 to -0.1 ms) was detected if its amplitude reached 4\*std of the measured baseline (-5 to  
778 -2.5 ms). The conduction velocity was estimated by fitting a line through each channel local minima  
779 (Figure S1G). This analysis was performed independently for each of the four electrode columns  
780 of the Neuropixels probe and the best fit was used as the measure for conduction velocity.  
781 Conduction velocity estimates with  $R^2$  below 0.8 were not included (Figures S1).

782

### 783 **Electrically coupled neighboring retinal ganglion cells**

784 Putative electrically coupled RGCs can be identified based on the presence of characteristic  
785 double peaks in the spike train cross-correlograms (Mastronarde, 1983). To identify significant  
786 double peaked CCGs, we estimated the baseline between -10 to -5 ms and the peaks on both  
787 sides of the zero-lag (-2.5 to -0.5 ms and 0.5 to 2.5 ms). RGC-RGC pairs were considered coupled  
788 when both peaks were significantly different ( $> 3 * \text{std}$ ) from baseline (Figures S5B/C).

789

### 790 **Synaptic contact field of afferent axonal arbors**

791 The high-density of recording sites enables to identify the spatial location of the electrical signals  
792 of RGC axons on the probe and hence their anatomical location within SC. Importantly, the  
793 waveforms of RGC axons also contains the post-synaptic response of SC dendrites (Figures 1D  
794 and F) which we used as a proxy for the anatomical location where the RGC axonal arbors make  
795 synaptic contacts with SC neurons. Since the Neuropixels probes is organized in four columns of  
796 electrodes we could measure the spatial location both along and across the probe (Figures 2A,  
797 bottom right) and we define this area on the probe the axonal arbor synaptic contact field (AF). To  
798 characterize the spatial position of AF we fitted a two-dimensional Gaussian function to the two-

799 dimensional representation of the synaptic contact field (Figure 2A, bottom-right). This Gaussian  
800 fit was necessary because some of the RGC AFs were only partially covered by the recording  
801 sites on the probe, e.g. the example in Figure 2A. To fit the AFs we assumed fixed widths of the  
802 Gaussian functions and this only optimized the x and y position of the Gaussian by least squares  
803 fitting. The AF center position was estimated from the Gaussian fit and could be located close to  
804 the electrode border or even outside of the recording sites (Figures 2A and S5/S7).

805

### 806 **Comparing retinal ganglion cell mosaics at the level of dendrites and axons**

807 To compare the spatial organization of the RGC mosaic at the level of receptive fields (RF) within  
808 the retina with the organization of the RGC mosaic at the level of the RGC axons within the SC/OT  
809 we estimated the RF and AF centers using the center-of-mass measurement (Figure 2C, RF  
810 centers = circles, AF centers = crosses). The ensemble of RF and AF center positions were  
811 subsequently used to characterize the RGC mosaics with the following two measurements. We  
812 calculated the Euclidean distance between the RF centers of RGC pairs (dRF) in the visual space  
813 (deg) and the distance between the AF centers (dAF) in the SC space ( $\mu\text{m}$ ) (Figure 2D). To test  
814 for hexagonality of the mosaics we used the Delaunay and Voronoi tessellations (Zhan and Troy,  
815 2000) and estimated the angles of the Delaunay triangles (Figure 2E). For directly comparing the  
816 similarity between the RF and AF mosaics we first had to transform the AF mosaic from SC space  
817 ( $\mu\text{m}$ ) into the visual space of the RF mosaic (deg). We achieved this by linearly scaling and rotating  
818 the center positions of the AF mosaic such that the summed distances between RF and AF  
819 positions were minimized. Important to note, this alignment step does not change the geometric  
820 organization of the AF mosaic. From this transformed AF mosaic we calculated the distance  
821 between RF and AF centers of individual RGCs. We divided this RF-AF distance by the mosaic  
822 spacing factor, which was estimated as the median RF distances between nearest RGC  
823 neighbors. Thus, a mosaic spacing of one describes the distance between two neighboring RGCs  
824 and a value of zero the situation when the centers are overlapped (Figure 2G). To assess the  
825 similarity in the geometrically organization of the RF and AF mosaics we calculated the Euclidean  
826 distances between RFs (dRF) and AFs (dAF) of pairs of RGCs (Figure 2H) and estimated the  
827 enclosed angle within triangles between RGCs (Figure 2I).

828

### 829 ***In vivo* connectivity analysis**

830 Monosynaptic connections between RGC axons and SC neurons were detected using established  
831 methods (Bereshpolova et al., 2020; Denman and Contreras, 2013; Reid and Alonso, 1995; Usrey  
832 et al., 1998) on the jitter corrected cross-correlograms (CCGs) (Figure S6A-C) based on  
833 statistically significant peaks at synaptic delays (+0.5 to 3.5 ms, purple) above the baseline (Figure

834 S6A, -3.5 to 0 ms, green). Peaks had to extend over the threshold for at least 5 consecutive time  
835 bins (0.1 ms resolution). The cross correlations were calculated using the pycorrelate package  
836 (<https://github.com/tritemio/pycorrelate>) (Figure S6). Spike times over the entire recording were  
837 used in the CCG analysis. The jitter correction was required to remove stimulus-evoked common  
838 input. To estimate the jitter correction, we followed established approaches (Denman and  
839 Contreras, 2013; Smith and Kohn, 2008). Briefly, we calculated a jittered version of each spike  
840 train by randomizing all spike times within consecutive 10-15 ms windows (Smith and Kohn, 2008).  
841 We then calculated the cross-correlation between a pair of neurons both for the original (raw CCG)  
842 and the jittered spike train (jittered CCG). Subtracting the jittered CCG from the raw CCG results  
843 in a jitter-corrected CCG.

844

### 845 **Efficacy and contribution**

846 Synaptic efficacy and contribution measures of connected pairs were estimated using standard  
847 approaches (Bereshpolova et al., 2019; Reid and Alonso, 1995; Swadlow and Gusev, 2002; Usrey  
848 et al., 1999). Briefly, efficacy was estimated from the jitter corrected CCGs by dividing the area of  
849 the CCG peak (peak window: 0.5 to 3.5 ms, Figure S6A, purple) by the total number of presynaptic  
850 spikes. Thus, an efficacy measure of 1 (100%) would reflect that for each presynaptic spike, a  
851 postsynaptic spike could be detected. To estimate the contribution, we counted the number of SC  
852 spikes that were preceded by a retinal afferent spike, in a time window between -3 to -0.5 ms, and  
853 divided this number by the total number of SC spikes. A contribution of 1 (100%) indicates that all  
854 spikes of an SC neuron are preceded by retinal activity.

855

### 856 **Receptive fields**

857 Spatiotemporal receptive fields (STRF) were calculated from the peristimulus time histogram  
858 (PSTH) for each stimulus position on the 36x22 grid with a 1 ms resolution, resulting in a 3D matrix  
859 of visually evoked activity (x-space, y-space, time). The spatial receptive fields were calculated  
860 via spike-triggered average (STA) and by using the receptive field at lag -1 as the corresponding  
861 onset RF (Kremkow et al., 2016). RFs were interpolated by a factor of two using the 2D-cubic-  
862 interpolation function from the SciPy package. RF size was estimated from both responses to light  
863 and dark sparse noise stimuli. The RF overlap index was calculated as the number of overlapping  
864 pixels in both ON and OFF RFs, defined as 40% of the RFs maximum. The RF distance was  
865 calculated by the Euclidean distance between the RF centers. The similarity of the STRFs  
866 between pairs of neurons was estimated by the correlation coefficient. For this analysis, the  
867 STRFs were calculated with a 100 ms resolution (Figure 5A). Only RFs with high signal-to-noise  
868 ratio (SNR >10) were included in the analysis.

869 **Orientation tuning**

870 To determine orientation tuning, we quantified the responses to moving bars as the maximum  
871 response of the PSTH in each exposed direction. The obtained tuning curve was first interpolated  
872 on 30 points before fitting with von Mises function (Kremkow et al., 2016) using the least square  
873 optimization function from SciPy (Figures 4C-D and Figures S8).

874

875 **Data availability**

876 The datasets that support the findings of this study are available from the corresponding author  
877 on reasonable request.

878

879 **Code availability**

880 All Python code will be made available upon request.

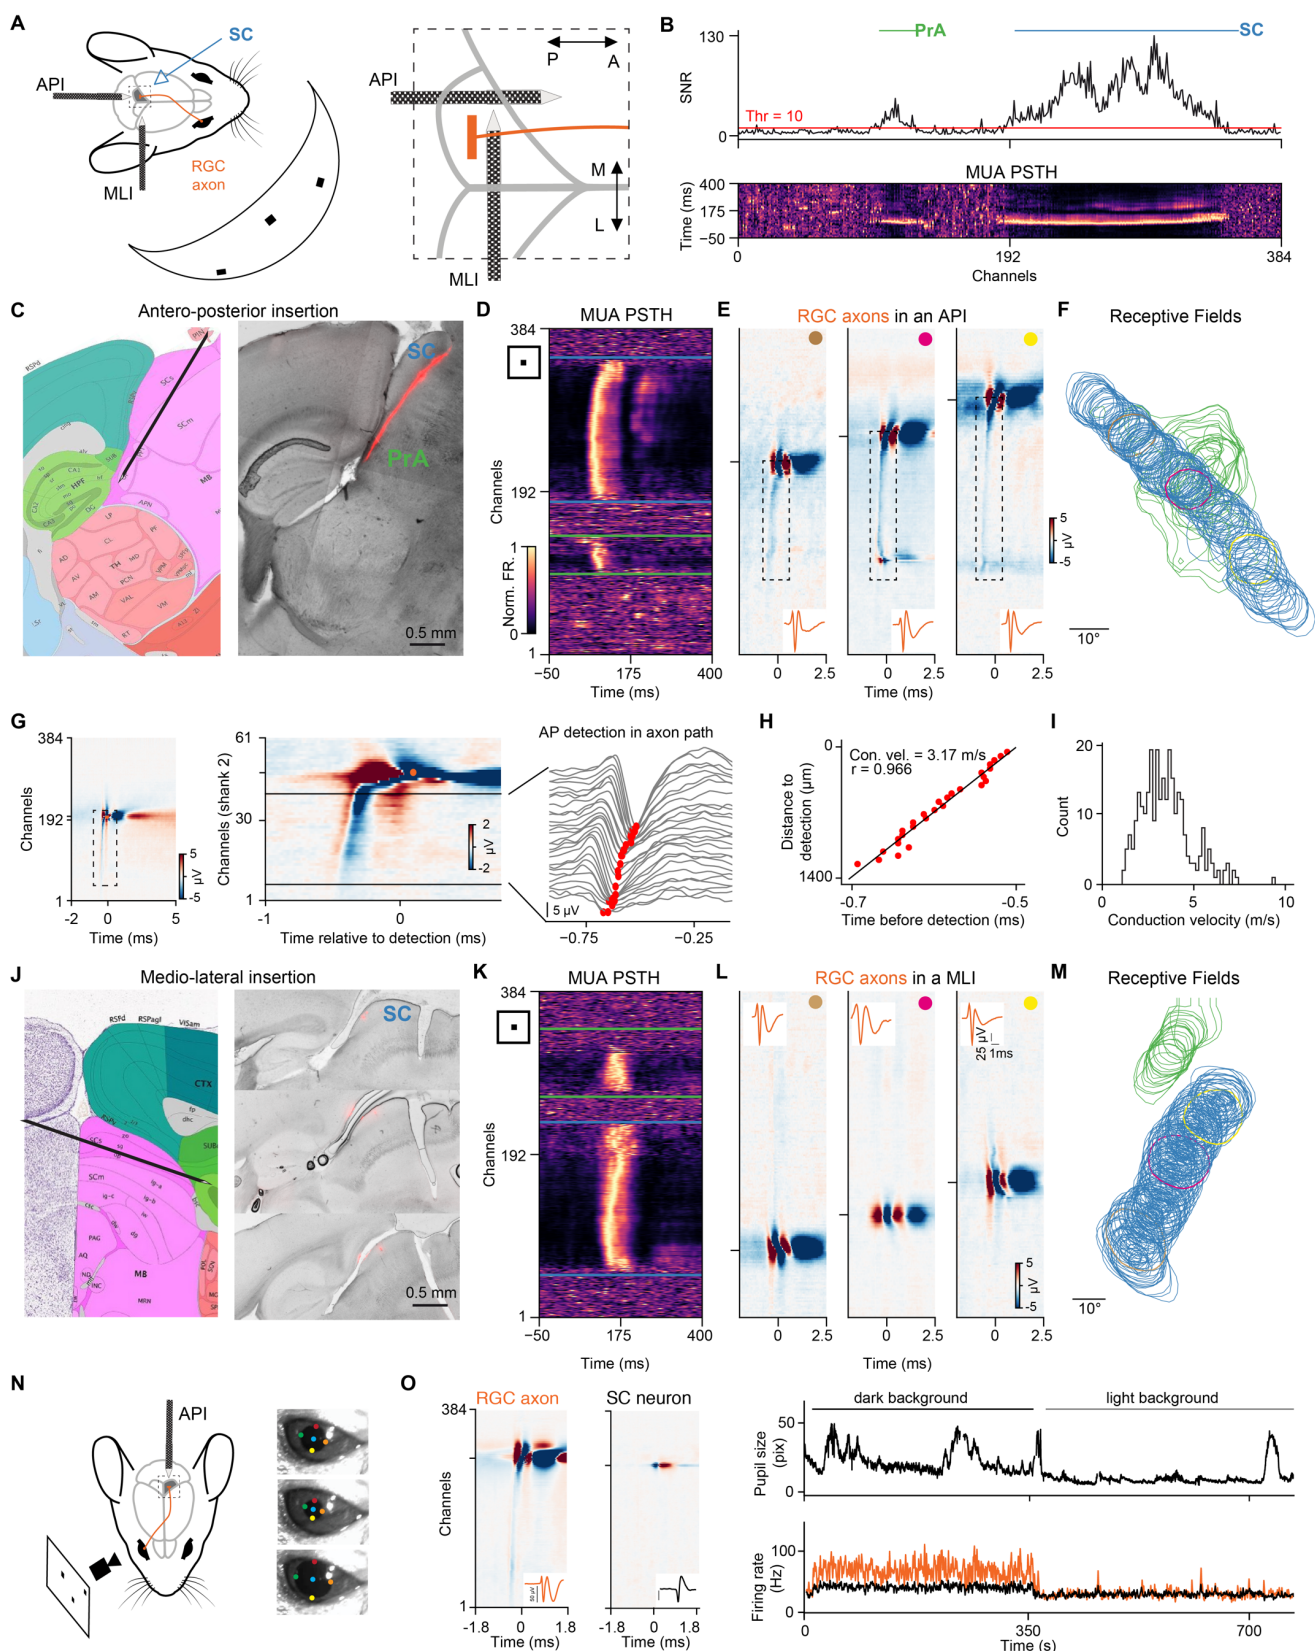

881

882 **Figure S1. Recording RGC axons and SC neurons in the mouse *in vivo*, related to Figure 1.**

883 Legend on the next page.

884 **Figure S1. Recording RGC axons and SC neurons in the mouse *in vivo*, related to Figure 1.**

885 (A) Schematic of the mouse SC with the axonal projections of retinal ganglion cells (RGC) and visual dome  
886 setup (left). Zoom onto the Neuropixels probe implantations along the anterior posterior axis (API) and  
887 mediolateral axis (MLI) (right).

888 (B) Visually evoked multi-unit-activity (MUA). Peri-stimulus time histograms (PSTH) to white sparse noise  
889 on black background (bottom) and its corresponding signal-to-noise ratio (SNR) (top). In this recording two  
890 regions exhibit visually driven activity: SC and pretectal areas (PrA).

891 (C) Sagittal brain slice with a Dil staining of the Neuropixels recording track from an API and the  
892 corresponding location in the Allen Institute Common Coordinate Framework (CCF).

893 (D) MUA PSTH to the sparse noise stimulus for the API in C. The SC response (between the blue horizontal  
894 lines) covers the upper channels, the lower region is likely within the pretectal areas (green).

895 (E) Multi-channel waveforms (MCW) of three selected RGC axons from the recording shown in D. The  
896 dashed black rectangle highlights the axonal action potential (AP) propagating along the axonal path. The  
897 best channel (BC), i.e. the channel with the largest waveform amplitude, is indicated by the horizontal tick,  
898 and the insets show the RGC axonal waveform at their respective BC in orange.

899 (F) MUA receptive fields (RF) in each visually driven channel: SC (blue) and PrA (green). RFs at the BC of  
900 the example single units shown in E are plotted in their respective color.

901 (G) RGC axonal AP conduction velocity estimation in APIs. The AP propagation along the axon path  
902 (dashed rectangle) is evident in MCWs of RGC axons recorded in API, left. Close up view on the MCW in a  
903 single electrode shank (middle) with the detection of the AP in the axonal path by the local minima of the  
904 waveform in each channel (right, red dots).

905 (H) Axonal conduction velocity was estimated from a linear fit to the AP timepoints along the axon path (red  
906 dots in G, right).

907 (I) Histogram of RGC axonal conduction velocities across multiple recordings (mean conduction velocity =  
908  $3.5 \pm 1.3$  m/s,  $n = 283$  RGC axons, for RGC axons with  $R^2$  of linear fit  $> 0.8$ ).

909 (J-M) Example recording along the mediolateral axis. Same format as for API shown in C-F. Note that RGC  
910 axon paths are not visible in MCWs of RGC recorded in MLI because the Neuropixels probe is not in line  
911 with the RGX axons paths in this recording configuration.

912 (N) Recording RGC axons in SC of awake mice. Shown is the API recording configuration used to record  
913 from awake SC together with example images of the pupil tracking. The circles on the eye images  
914 schematically indicate the markers used for pupil position and size estimation.

915 (O) Example RGC axon and SC neuron recorded in awake SC (left). Pupil size during different stimulus  
916 conditions (top) and the neuronal activity (right) of an RGC axon (orange) and an SC neuron (black).



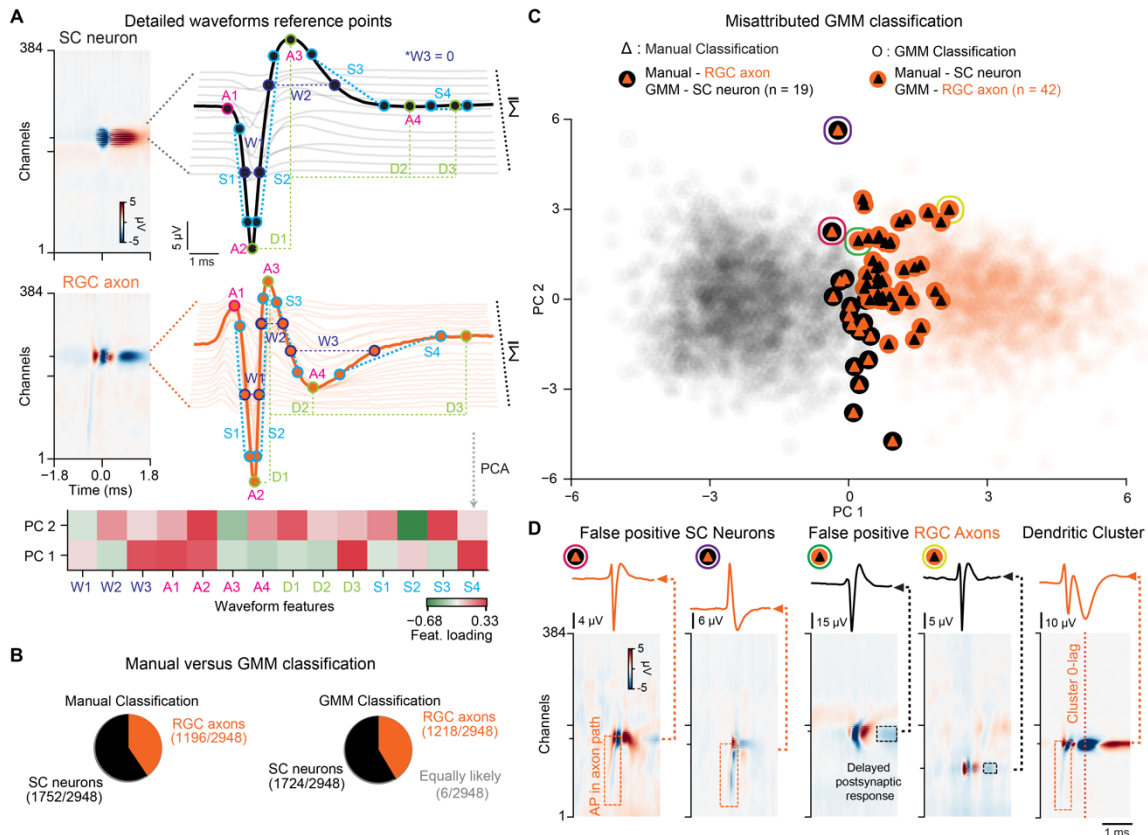

917 **Figure S2. RGC axon and SC neuron waveform classification, related to Figure 1.**

918 (A) Example waveforms of a somatic action potential from a single SC neuron (top) and from an RGC axon  
 919 in SC (middle). The multi-channel waveforms are shown as colormaps together with traces of several single-  
 920 channel waveforms within the spatial spread of interest. The waveforms were characterized by the following  
 921 measurements: W1 : half peak width of the detected negative peak (DNP), W2 : half peak width of positive  
 922 peak after detection (PPAD), W3 : half peak width of second negative peak after detection (SNPAD), A1 :  
 923 amplitude of the positive peak before detection (PPBD), A2 : DNP's amplitude, A3 : PPAD's amplitude, A4  
 924 : SNPAD's amplitude, D1 : difference DNP to PPAD, D2 : difference DNP to SNPAD, D3 : difference DNP  
 925 to baseline, S1 : depolarization slope, S2 : repolarization slope, S3 : recovery slope PPAD to SNPAD, S4 :  
 926 recovery slope SNPAD to baseline. The loading of these different features on the two first principal  
 927 components (PCs) is represented in a heatmap (bottom). The two first PCs were used in the Gaussian  
 928 mixture model (GMM) for classification.

929 (B) Pie charts showing the results of the GMM vs. the manual classification.

930 (C) Scatter plot of PC1 and PC2 projections (top) of the manual classification (blurred). Misclassified GMM  
 931 clusters are shown as large colored disks. Four examples (purple, red, green, yellow circle on top,  
 932 corresponding to the examples in d) illustrate misclassified clusters and their corresponding MCW.

933 (D) False positive SC neurons are identified by the presence of an axonal tail (orange dashed squares) in  
 934 the MCW (two left). False positive RGC axons are identified by the presence of an unexpected negative  
 935 peak after detection (black dashed squares two examples in the middle right). Waveforms that were  
 936 detected on the postsynaptic response of the RGC axon waveform were identified as dendritic clusters and  
 937 excluded from the dataset (right).

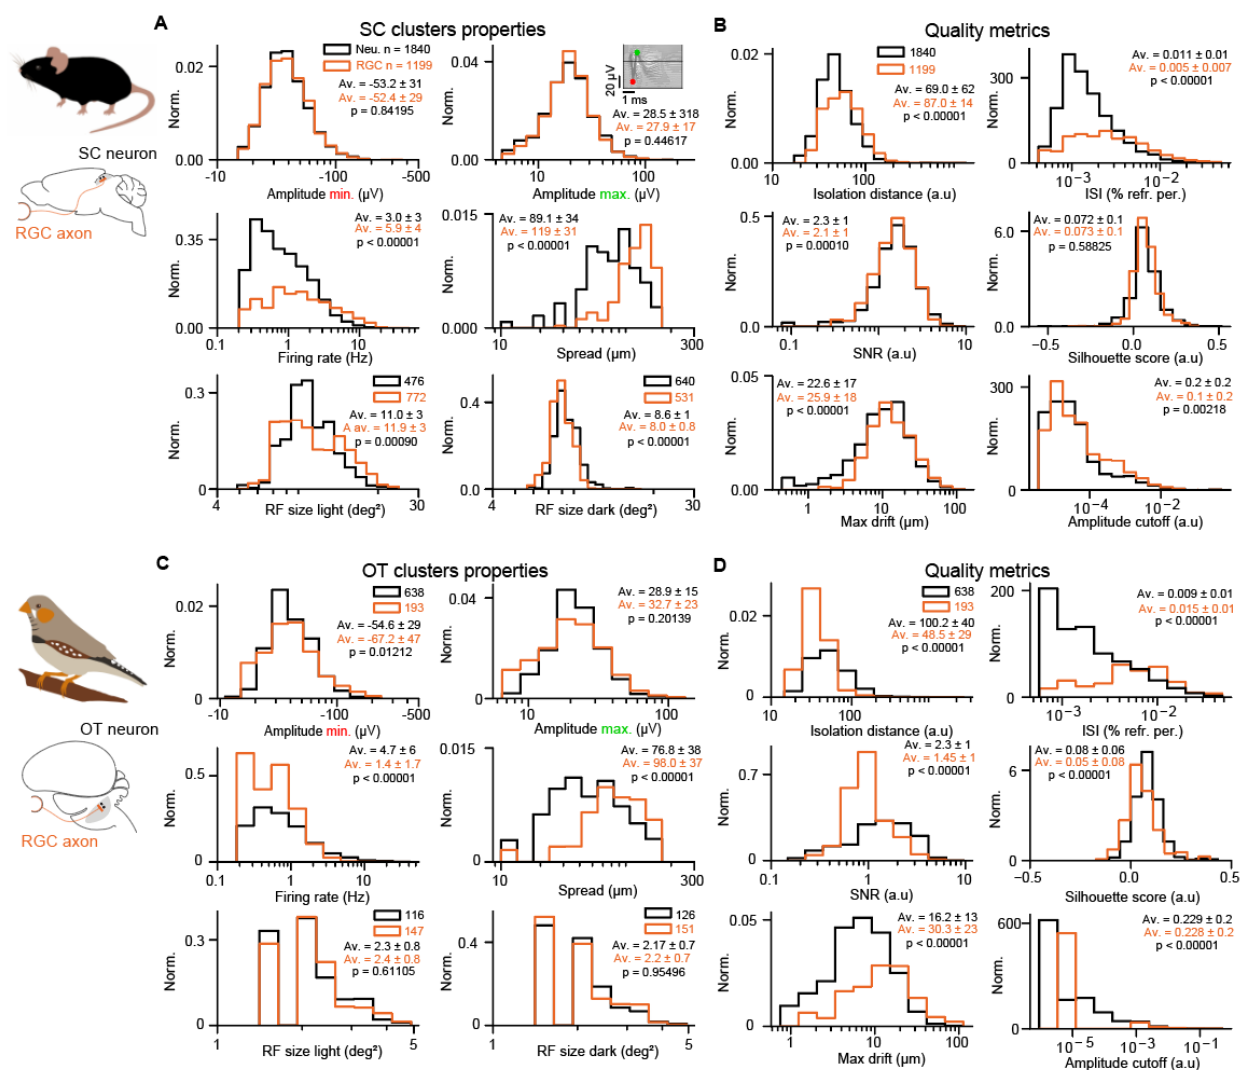

938  
939 **Figure S3. Properties and quality metrics of single units in the mouse superior colliculus and zebra**  
940 **finch optic tectum, related to Figures 1 and 6.**

941 (A-B) Overview of the mouse dataset. (C-D) Overview of the zebra finch dataset.  
942 (A) Cluster properties in the mouse: Negative (top left) and positive (top right) amplitudes of the waveform  
943 are estimated from the MCW, all shown on log-normal scale. Firing rate (FR) (middle left) and waveform  
944 spatial spread (middle right) in both populations of RGC axons and SC neurons show significant differences:  
945 RGC axons exhibit a higher FR and a larger waveform spread. Receptive field (RF) sizes, obtained from  
946 only clusters with high signal-to-noise RFs (SNR > 10) were estimated using both light (left) and dark (right)  
947 sparse noise.  
948 (B) Single unit quality metrics. RGC axons and SC neurons have similar quality measures.  
949 (C) Cluster properties in the zebra finch dataset, same format as in A.  
950 (D) Quality metrics in the finch dataset, shown as in B.

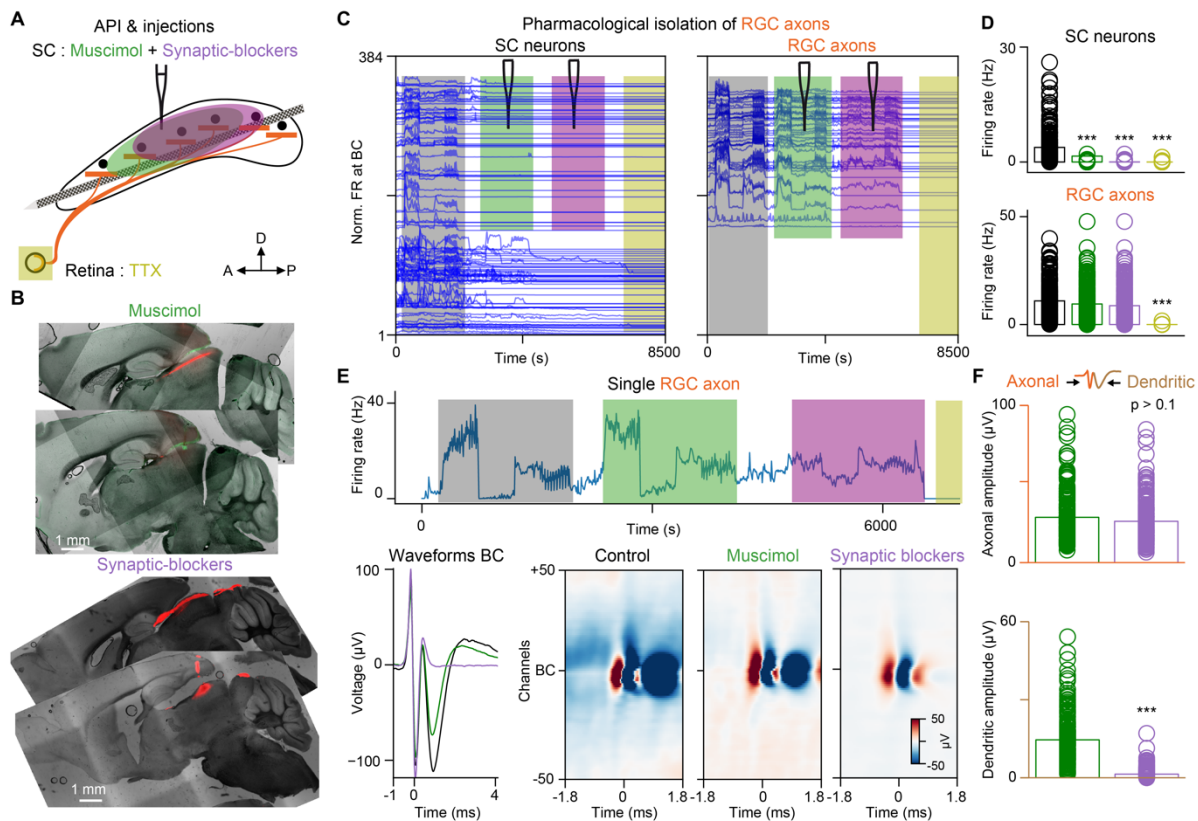

951 **Figure S4. Pharmacological confirmation of RGC axons in the SC, related to Figure 1.**

952 (A) Schematic showing the pharmacological injections: Muscimol (green), synaptic blocker (purple) and  
953 Tetrodotoxin (TTX, yellow).

954 (B) Sagittal brain slices illustrating the injections of Muscimol (left, green) and synaptic blocker (right, red)  
955 with Dil staining from API insertions (top, red).

956 (C) SC neuron activity, aligned to the BC. RGC axons recorded in the same region aligned to their BC  
957 (right). The pharmacological injections are indicated by different colors. Activity of SC neurons decreases  
958 following Muscimol injection, while the activity of RGC axons remains stable.

959 (D) Quantification of firing rate changes of SC neurons and RGC axons during the different pharmacological  
960 conditions. Control (black): SC neurons =  $3.8 \pm 4.2$  Hz, RGC axons =  $7.9 \pm 10.6$  Hz; Muscimol (green): SC  
961 neurons =  $1.5 \pm 2.6$  Hz, RGC axons =  $7.2 \pm 9.3$  Hz; synaptic blocker (purple): SC neurons =  $0.03 \pm 0.16$  Hz,  
962 RGC axons =  $8.67 \pm 8.5$  Hz; TTX (yellow): SC neurons =  $0.01 \pm 0.13$  Hz, RGC axons =  $0.1 \pm 0.006$  Hz. n = 224  
963 SC neurons, n = 215 RGC axons.

964 (E) A single RGC axons during the entire recording (top) illustrating the stability of RGC axon detection even  
965 after application of the synaptic blockers. The waveform of the same RGC axons is shown at its BC (bottom  
966 left) and across 100 channels (bottom right) for the control (black), Muscimol (green) and synaptic blockade  
967 (purple) condition. Note that the postsynaptic dendritic rebound (second trough in the RGC axon waveform)  
968 is abolished after the application of synaptic blockers.

969 (F) Quantification of the axonal (top) and dendritic signal amplitudes (bottom) during the application of  
970 Muscimol (green) and synaptic blockers (purple) (axonal amplitude: Muscimol =  $28.8 \pm 14.5$   $\mu$ V, synaptic  
971 blocker =  $26.3 \pm 13$   $\mu$ V, p > 0.1; dendritic amplitude: Muscimol =  $14.5 \pm 9.04$   $\mu$ V, synaptic blocker =  $1.39 \pm 1.9$   
972  $\mu$ V; n = 203 RGC axons). \*\*\* = p < 0.001.

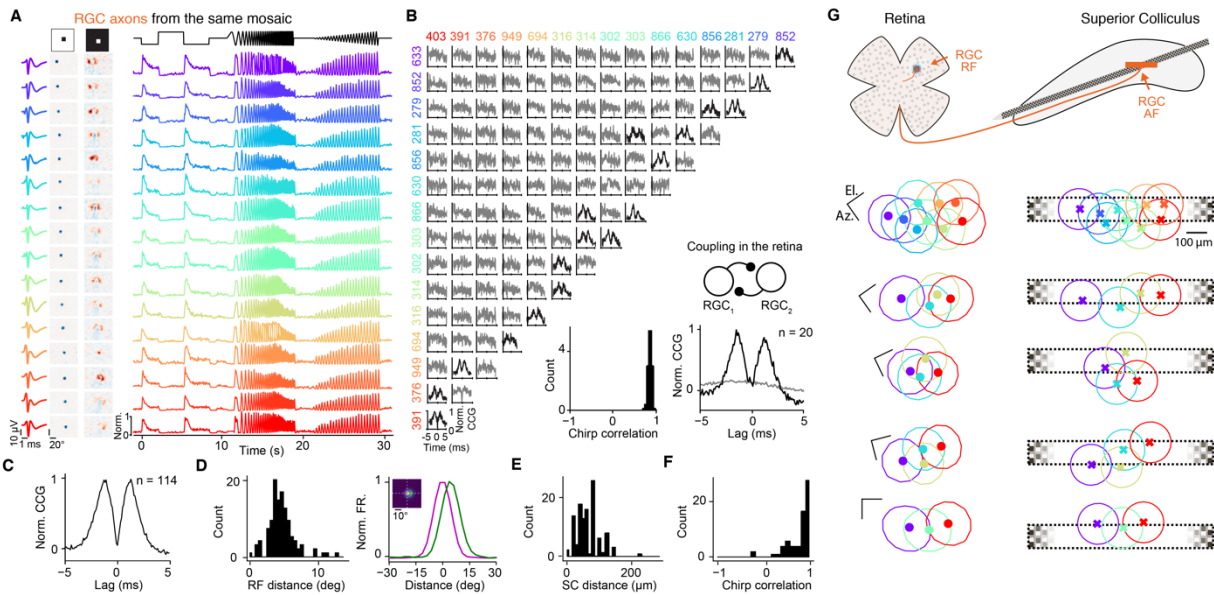

973

974 **Figure S5. *In vivo* recording of retinal axon mosaics, related to Figures 1 and 2.**

975 (A) Simultaneously recorded RGC axons in mouse SC from the same functional retinal mosaic (OFF-  
 976 transient). Shown are: the waveforms at the best channel (left column), RFs for both dark (middle left  
 977 column) and light (middle right column) sparse noise targets and the responses to the chirp stimulus (right).  
 978 Note the classical OFF-center, ON-surround RF organization and the OFF-transient responses during the  
 979 chirp stimulus for all RGCs.

980 (B) Cross-correlograms (CCGs) between the RGC axons shown in A. Note: neighboring RGCs can show  
 981 double peaks in the CCGs (black traces) that are characteristic for coupling between RGCs in the retina  
 982 (Mastrorade, 1989). The insets (bottom, right) show the histogram of the correlation coefficient of the chirp  
 983 responses between pairs of putative coupled RGCs from this mosaic (mean correlation =  $0.93 \pm 0.02$ ,  $n = 20$   
 984 coupled pairs) and the population average CCG of RGC pairs with significant coupling (black,  $n = 20$  coupled  
 985 pairs) and uncoupled pairs (gray).

986 (C) Average CCG of coupled RGCs from multiple experiments ( $n = 114$  RGC pairs,  $n = 32$  mice).

987 (D) RF distance of coupled RGC pairs (left) and average RF profiles (right). RGC pairs (green and magenta  
 988 lines) have partially overlapping RFs (mean RF distance =  $4.70 \pm 1.95^\circ$ ,  $n = 114$  RGC pairs).

989 (E) Putative coupled RGCs project to neighboring locations in SC (left, mean SC distance =  $65.54 \pm 34.53$   
 990  $\mu\text{m}$ ,  $n = 114$  coupled pairs) and the majority show similar functional responses to a chirp stimulus (right,  
 991 mean correlation =  $0.79 \pm 0.22$ ,  $n = 114$  coupled pairs).

992 (G) Multiple examples of retina mosaics at the level of RGC dendrites (RF) and RGC axons (AF) measured  
 993 in mouse SC ( $n = 4$  mice). Scale bars for the RFs: 10 deg.

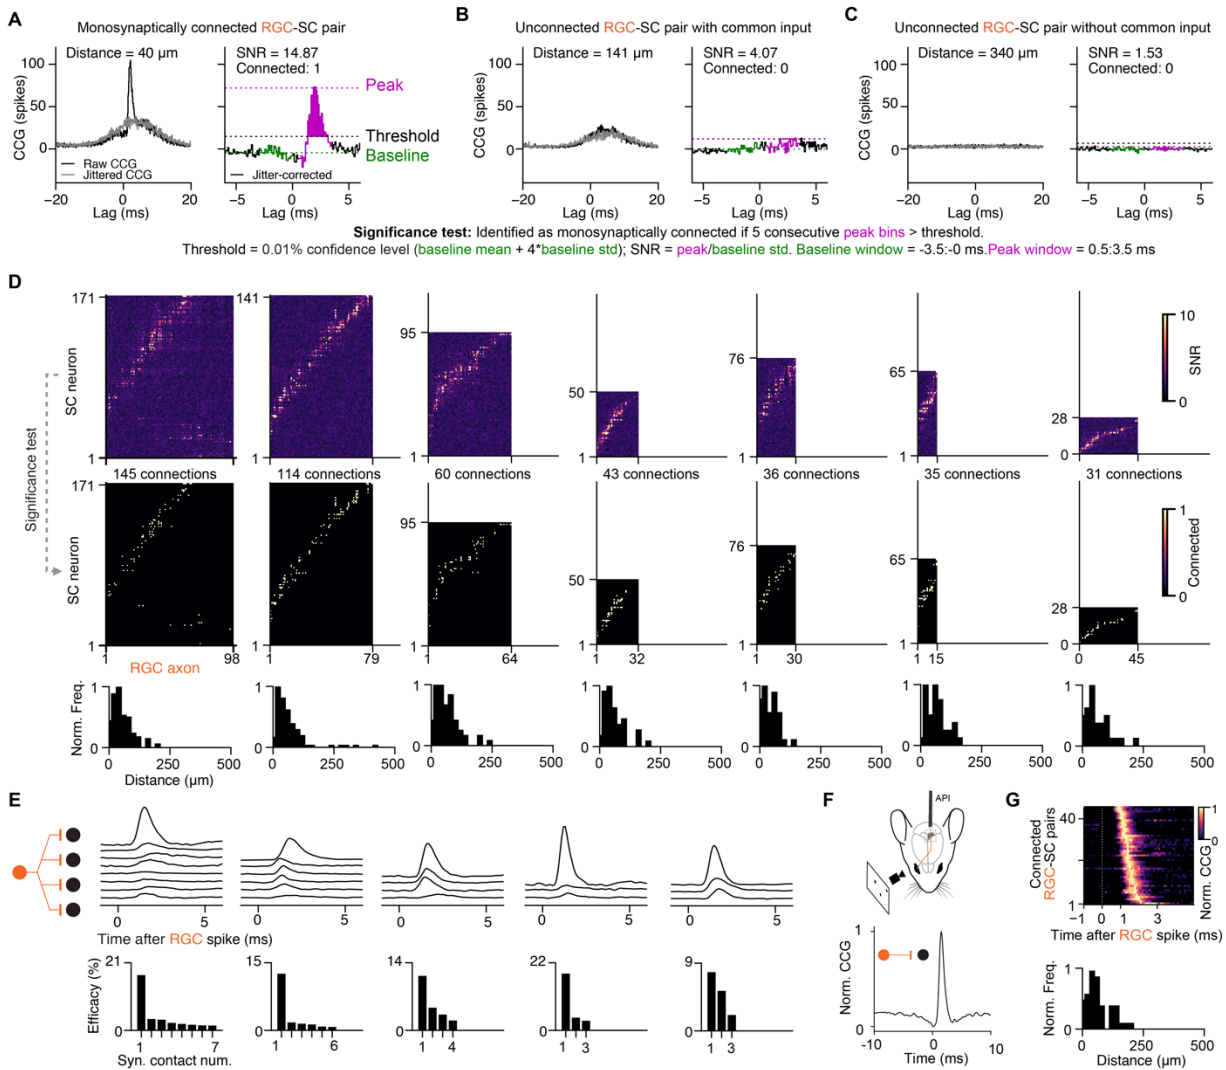

994 **Figure S6. *In vivo* connectivity analysis, related to Figure 3.**

995 (A) Example CCG of a monosynaptically connected RGC-SC pair. Left, the black trace shows the raw CCG  
 996 and the gray trace the jittered CCG. The transient peak at short latency is characteristic for monosynaptically  
 997 connected neurons while the broader peak is common input. In the jitter-corrected CCG (raw-jitter) the  
 998 common input is subtracted allowing to identify monosynaptically connected pairs (right) by estimating the  
 999 statistical significance of the transient peak (magenta, see Methods).  
 1000 (B-C) Examples of unconnected RGC-SC pairs, with common input (B) and without common input (C).  
 1001 (D) Connectivity matrices of multiple examples recordings: the CCG peak SNR (top) and statistical identified  
 1002 connections (middle) are shown. The histogram of the distances between connected RGC-SC pairs on the  
 1003 probe is shown below.  
 1004 (E) Example CCGs of divergent connections from single RGC axons to multiple SC neurons (top). The  
 1005 efficacy is non-uniform with few strong and several weak connections (bottom).  
 1006 (F) Example of a monosynaptically connected RGC-SC pair in awake mouse.  
 1007 (G) CCGs of connected pairs across multiple experiments in awake mice, sorted by peak latency (top).  
 1008 Distance between connected RGC-SC pairs on the probe (bottom).

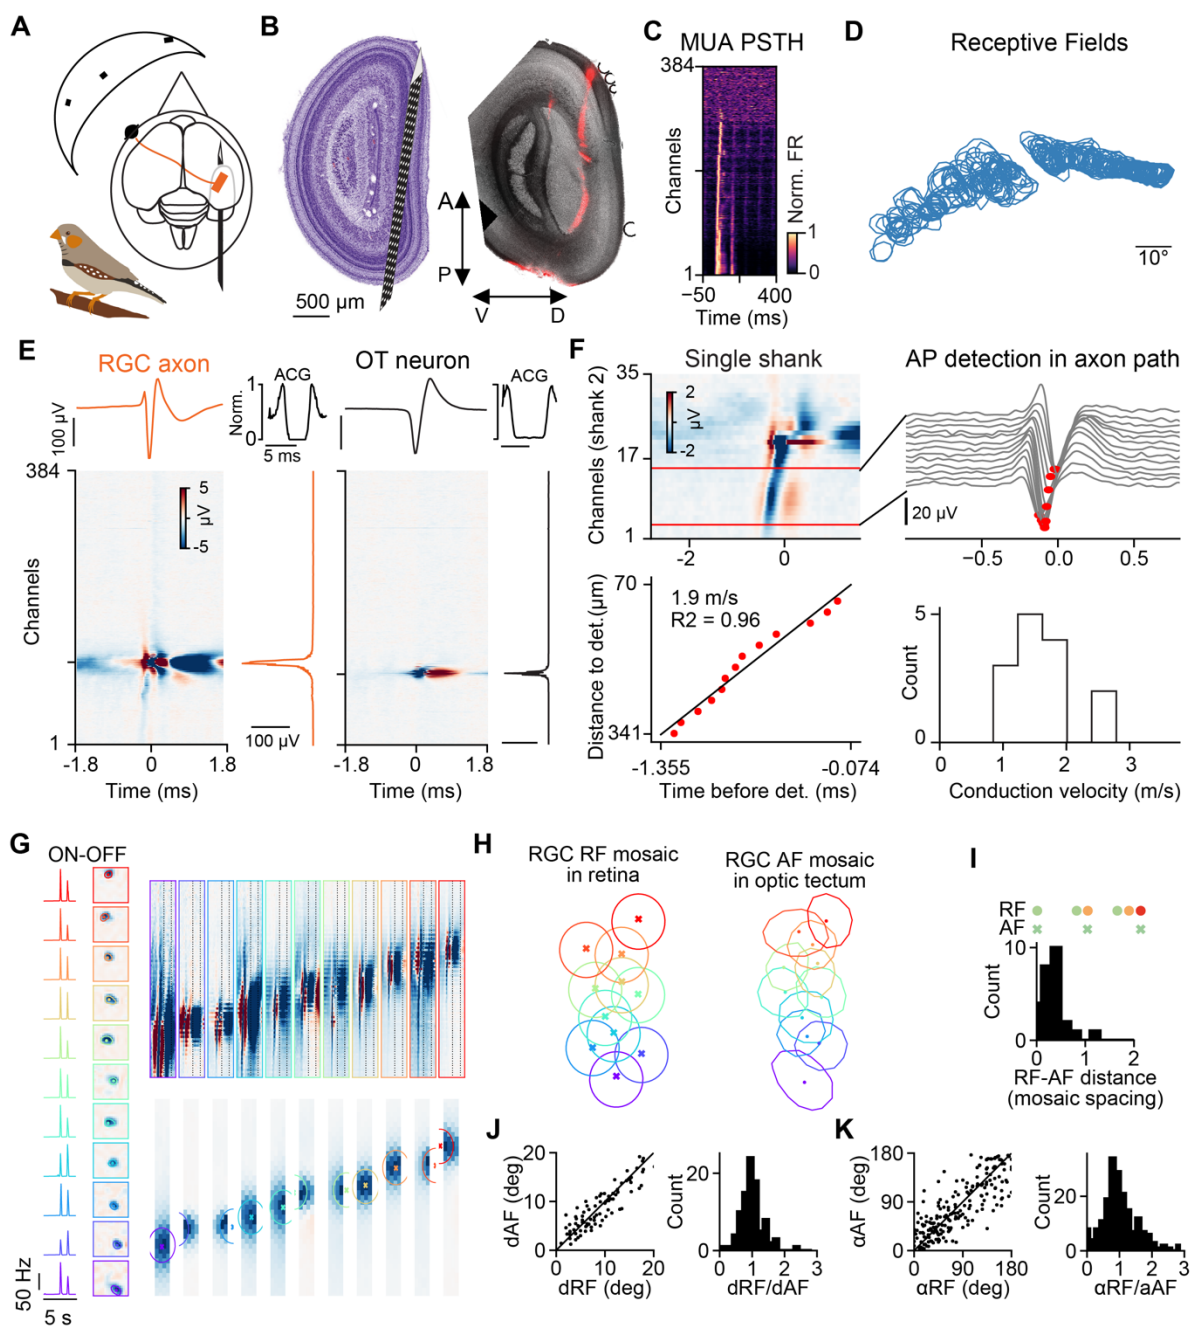

1009 **Figure S7. RGC axon mosaics in the optic tectum of zebra finch, related to Figure 6.**

1010 Legend on the next page.

1011 **Figure S7. RGC axon mosaics in the optic tectum of zebra finch, related to Figure 6.**

1012 (A) Retinotectal projections in the zebra finch.

1013 (B) Sagittal slices of the OT with Dil staining from an anteroposterior insertion (right), with its corresponding  
1014 location in the ZEBRA histological atlas (left).

1015 (C) Visually-evoked MUA identifies the recording sites located within OT. The colormap shows the PSTH of  
1016 each channel in response to a sparse noise stimulus.

1017 (D) Receptive fields of the MUA shown in C.

1018 (E) MCW of an RGC axon and an OT neuron and the corresponding amplitude profile along the probe  
1019 (right), its waveform shape at the BC (top) with their spike train auto-correlogram (ACG, top right).

1020 (F) Closeup view on an RGC axon (top left) in a single electrode shank, with the area of interest (top right)  
1021 showing the detection of the AP in the axon path by the local minimal (red dots). Axonal conduction velocity  
1022 (bottom left) was estimated from a linear fit to the AP time points along the axonal path. The fit was  
1023 performed for each of the four shanks of the probe separately and the best fit was included when  $R^2 > 0.75$ .  
1024 Conduction velocities across multiple recordings and RGC axons (bottom right, mean conduction velocity =  
1025  $1.5 \pm 0.5$  m/s,  $n = 14$  RGC axons,  $n = 2$  zebra finches).

1026 (G) Simultaneous measurement of RGCs belonging to the same functional retinal mosaic. RGC functional  
1027 type was identified using a chirp stimulus (left) and receptive field polarity (left). In this example RGCs were  
1028 from the ON-OFF type. The corresponding receptive fields (RF, middle) and axonal synaptic contact fields  
1029 (AF, right) cover a large extend of the visual field and SC tissue.

1030 (H) The RFs and AFs mosaic of the example shown in G with their respective contours and colors.

1031 (I) Histogram of the distances between RF and AF centers in the unit of mosaic spacing (median RF-AF  
1032 distance =  $0.42 \pm 0.25$  mosaic spacings,  $n = 26$  RGCs).

1033 (J) Distances between RF centers (dRF) and AF centers (dAF) are similar. dRF plotted against dAF and  
1034 histogram of the dRF/dAF ratios (median dRF/dAF =  $1.05 \pm 0.33$ ,  $n = 92$  RGC pairs).

1035 (K) Angles between RGC triples in the RF and AF mosaic are similar.  $\alpha$ RF plotted against  $\alpha$ AF and  
1036 histogram of the  $\alpha$ RF/ $\alpha$ AF ratios (median  $\alpha$ RF/ $\alpha$ AF =  $1.01 \pm 0.85$ ,  $n = 199$  angles).

1037

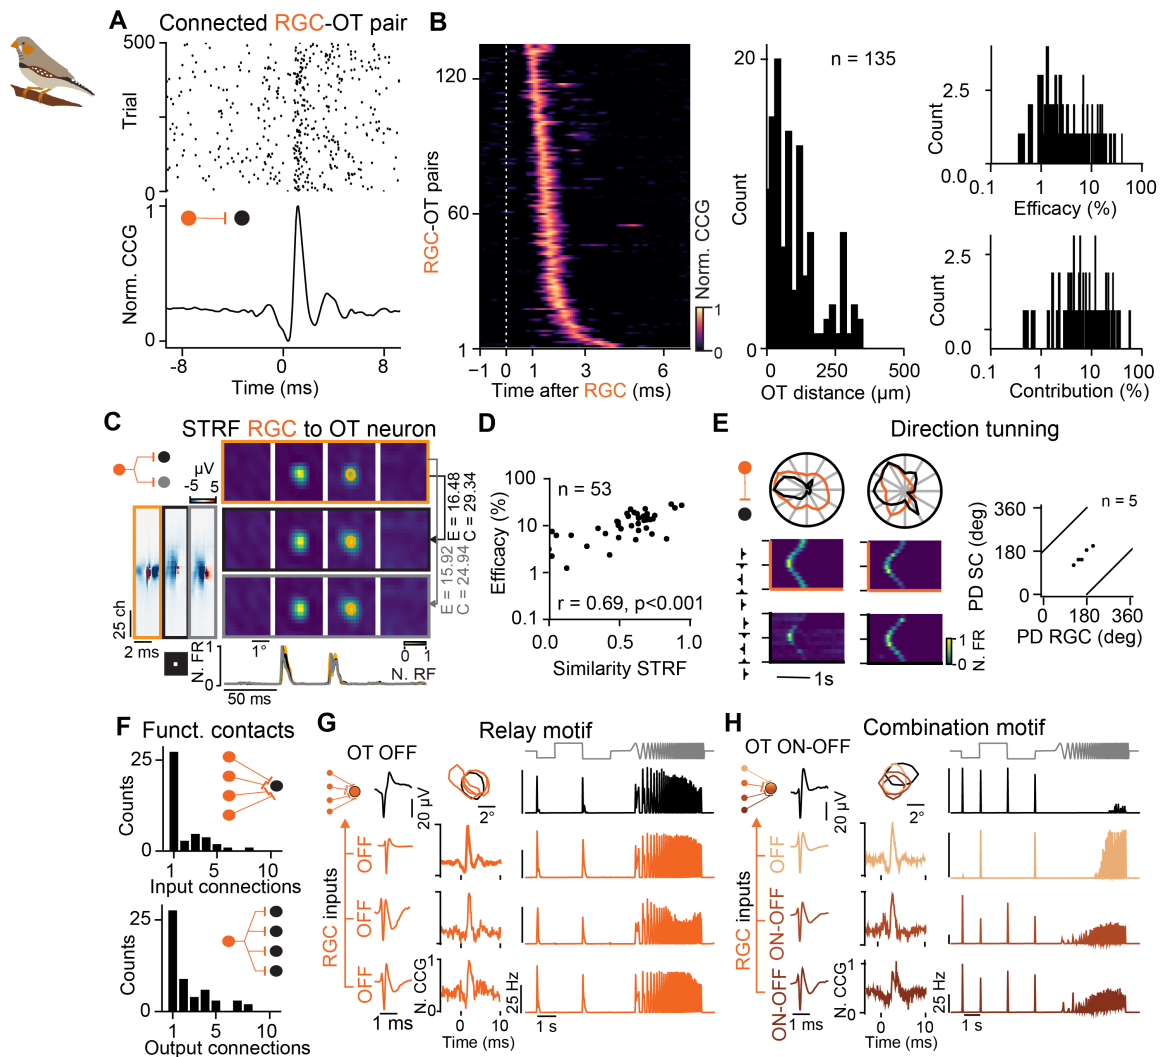

1038 **Figure S8. Functional connectivity between retina and optic tectum in zebra finches, related to**  
 1039 **Figure 6.**

1040 (A) Example of an identified connection between an RGC axon RGC and an OT neuron. Shown are the  
 1041 raster plot (top) and the corresponding spike train CCG (bottom).

1042 (B) Representation of all connected pairs recorded in the zebra finch dataset (left) and the corresponding  
 1043 distance of connected pairs on the probe (middle). The synaptic efficacy (top right) and contribution (bottom  
 1044 right) exhibit log-normal distribution ( $n = 7$  zebra finches,  $n = 628$  OT neurons,  $n = 193$  RGC axons,  $n = 135$   
 1045 connected RGC-OT pairs).

1046 (C) Similarity between visual response properties of an RGC axon (orange) and two postsynaptic OT  
 1047 neurons (black and gray). Shown are the STRF and the corresponding PSTH response (bottom).

1048 (D) Correlation between the similarity of STRFs and connection efficacy.

1049 (E) Direction tuning of connected RGC-OT pairs. The preferred direction (PD) of RGC axons and their  
 1050 connected postsynaptic OT neurons match (PD difference =  $17.26 \pm 7.04^\circ$ ,  $n = 5$  connected pairs).

1051 (F) Number of measured divergent and convergent RGC-OT connections.

1052 (G) Relay motif example, three RGC axons (orange) converge onto one OT neuron (black), all exhibiting  
 1053 similar OFF responses and have overlapping RFs, different waveforms and single-sided CCG peak.

1054 (H) Same as in g but for a combination motif example. Here, different RGC response types converge onto  
 1055 an ON-OFF OT neuron.

1056



1057 **REFERENCES**

- 1058 Ahmadlou, M., and Heimel, J.A. (2015). Preference for concentric orientations in the mouse  
1059 superior colliculus. *Nat Commun* 6, 6773.
- 1060 Alonso, J.-M., and Swadlow, H.A. (2005). Thalamocortical Specificity and the Synthesis of  
1061 Sensory Cortical Receptive Fields. *J Neurophysiol* 94, 26–32.
- 1062 Baden, T., Berens, P., Franke, K., Rosón, M.R., Bethge, M., and Euler, T. (2016). The functional  
1063 diversity of retinal ganglion cells in the mouse. *Nature* 529, 345–350.
- 1064 Basso, M.A., Bickford, M.E., and Cang, J. (2021). Unraveling circuits of visual perception and  
1065 cognition through the superior colliculus. *Neuron* 109, 918–937.
- 1066 Beltramo, R., and Scanziani, M. (2019). A collicular visual cortex: Neocortical space for an  
1067 ancient midbrain visual structure. *Science* 363, 64–69.
- 1068 Benavidez, N.L., Bienkowski, M.S., Zhu, M., Garcia, L.H., Fayzullina, M., Gao, L., Bowman, I.,  
1069 Gou, L., Khanjani, N., Cotter, K.R., et al. (2021). Organization of the inputs and outputs of the  
1070 mouse superior colliculus. *Nat Commun* 12, 4004.
- 1071 Bereshpolova, Y., Stoelzel, C.R., Gusev, A.G., Bezdudnaya, T., and Swadlow, H.A. (2006). The  
1072 Impact of a Corticotectal Impulse on the Awake Superior Colliculus. *J Neurosci* 26, 2250–2259.
- 1073 Bereshpolova, Y., Stoelzel, C.R., Su, C., Alonso, J.-M., and Swadlow, H.A. (2019). Activation of  
1074 a Visual Cortical Column by a Directionally Selective Thalamocortical Neuron. *Cell Reports* 27,  
1075 3733-3740.e3.
- 1076 Bereshpolova, Y., Hei, X., Alonso, J.-M., and Swadlow, H.A. (2020). Three rules govern  
1077 thalamocortical connectivity of fast-spike inhibitory interneurons in the visual cortex. *Elife* 9,  
1078 e60102.
- 1079 Bischof, H.-J. (1988). The visual field and visually guided behavior in the zebra finch  
1080 (*Taeniopygia guttata*). *Journal of Comparative Physiology. A, Neuroethology, Sensory, Neural,*  
1081 *and Behavioral Physiology* 163, 329–337.
- 1082 Bruno, R.M., and Sakmann, B. (2006). Cortex Is Driven by Weak but Synchronously Active  
1083 Thalamocortical Synapses. *Science* 312, 1622–1627.
- 1084 Buzsáki, G., and Mizuseki, K. (2014). The log-dynamic brain: how skewed distributions affect  
1085 network operations. *Nat Rev Neurosci* 15, 264–278.
- 1086 Campagnola, L., Seeman, S.C., Chartrand, T., Kim, L., Hoggarth, A., Gamlin, C., Ito, S., Trinh,  
1087 J., Davoudian, P., Radaelli, C., et al. (2021). Local Connectivity and Synaptic Dynamics in  
1088 Mouse and Human Neocortex. *Biorxiv* 2021.03.31.437553.
- 1089 Cang, J., and Feldheim, D.A. (2013). Developmental Mechanisms of Topographic Map  
1090 Formation and Alignment. *Neuroscience* 36, 51–77.
- 1091 Cang, J., Savier, E., Barchini, J., and Liu, X. (2018). Visual Function, Organization, and  
1092 Development of the Mouse Superior Colliculus. *Annu Rev Vis Sc* 4, 1–24.

- 1093 Chen, H., Savier, E.L., DePiero, V.J., and Cang, J. (2021). Lack of Evidence for Stereotypical  
1094 Direction Columns in the Mouse Superior Colliculus. *J Neurosci* 41, JN-RM-1155-20.
- 1095 Cheng, T.-W., Liu, X.-B., Faulkner, R.L., Stephan, A.H., Barres, B.A., Huberman, A.D., and  
1096 Cheng, H.-J. (2010). Emergence of Lamina-Specific Retinal Ganglion Cell Connectivity by Axon  
1097 Arbor Retraction and Synapse Elimination. *J Neurosci* 30, 16376–16382.
- 1098 Cook, J.E., and Chalupa, L.M. (2000). Retinal mosaics: new insights into an old concept. *Trends*  
1099 *in Neurosciences* 23, 26–34.
- 1100 Cossell, L., Iacaruso, M.F., Muir, D.R., Houlton, R., Sader, E.N., Ko, H., Hofer, S.B., and Mrsic-  
1101 Flogel, T.D. (2015). Functional organization of excitatory synaptic strength in primary visual  
1102 cortex. *Nature* 518, 399–403.
- 1103 Denman, D.J., and Contreras, D. (2013). The Structure of Pairwise Correlation in Mouse Primary  
1104 Visual Cortex Reveals Functional Organization in the Absence of an Orientation Map. *Cerebral*  
1105 *Cortex* 24, 2707–2720.
- 1106 Deschênes, M., Timofeeva, E., and Lavallée, P. (2003). The Relay of High-Frequency Sensory  
1107 Signals in the Whisker-to-Barreloid Pathway. *J Neurosci* 23, 6778–6787.
- 1108 Devries, S.H., and Baylor, D.A. (1997). Mosaic Arrangement of Ganglion Cell Receptive Fields  
1109 in Rabbit Retina. *J Neurophysiol* 78, 2048–2060.
- 1110 Dhande, O.S., Hua, E.W., Guh, E., Yeh, J., Bhatt, S., Zhang, Y., Ruthazer, E.S., Feller, M.B.,  
1111 and Crair, M.C. (2011). Development of Single Retinofugal Axon Arbors in Normal and  $\beta 2$   
1112 Knock-Out Mice. *J Neurosci* 31, 3384–3399.
- 1113 Drager, U.C., and Hubel, D.H. (1976). Topography of visual and somatosensory projections to  
1114 mouse superior colliculus. *J Neurophysiol* 39, 91–101.
- 1115 Ellis, E.M., Gauvain, G., Sivyer, B., and Murphy, G.J. (2016). Shared and distinct retinal input to  
1116 the mouse superior colliculus and dorsal lateral geniculate nucleus. *J Neurophysiol* 116, 602–  
1117 610.
- 1118 English, D.F., McKenzie, S., Evans, T., Kim, K., Yoon, E., and Buzsáki, G. (2017). Pyramidal  
1119 Cell-Interneuron Circuit Architecture and Dynamics in Hippocampal Networks. *Neuron* 96, 505-  
1120 520.e7.
- 1121 Evans, D.A., Stempel, A.V., Vale, R., Ruehle, S., Lefler, Y., and Branco, T. (2018). A synaptic  
1122 threshold mechanism for computing escape decisions. *Nature* 558, 590–594.
- 1123 Feinberg, E.H., and Meister, M. (2015). Orientation columns in the mouse superior colliculus.  
1124 *Nature* 519, 229–232.
- 1125 Field, G.D., and Chichilnisky, E.J. (2007). Information Processing in the Primate Retina: Circuitry  
1126 and Coding. *Annu Rev Neurosci* 30, 1–30.
- 1127 Hagen, E., Fossum, J.C., Pettersen, K.H., Alonso, J.-M., Swadlow, H.A., and Einevoll, G.T.  
1128 (2017). Focal Local Field Potential Signature of the Single-Axon Monosynaptic Thalamocortical  
1129 Connection. *J Neurosci* 37, 5123–5143.

- 1130 Hannover, A. (1843). Mikroskopiske undersøgelser af nervesystemet. Vid. Sel. Naturvid. Og  
1131 Mathem. Afh. 9–112.
- 1132 Hong, Y.K., Kim, I., and Sanes, J.R. (2011). Stereotyped axonal arbors of retinal ganglion cell  
1133 subsets in the mouse superior colliculus. *J Comp Neurol* 519, 1691–1711.
- 1134 Huberman, A.D., Manu, M., Koch, S.M., Susman, M.W., Lutz, A.B., Ullian, E.M., Baccus, S.A.,  
1135 and Barres, B.A. (2008). Architecture and Activity-Mediated Refinement of Axonal Projections  
1136 from a Mosaic of Genetically Identified Retinal Ganglion Cells. *Neuron* 59, 425–438.
- 1137 Huberman, A.D., Wei, W., Elstrott, J., Stafford, B.K., Feller, M.B., and Barres, B.A. (2009).  
1138 Genetic Identification of an On-Off Direction- Selective Retinal Ganglion Cell Subtype Reveals a  
1139 Layer-Specific Subcortical Map of Posterior Motion. *Neuron* 62, 327–334.
- 1140 Isa, T., Marquez-Legorreta, E., Grillner, S., and Scott, E.K. (2021). The tectum/superior  
1141 colliculus as the vertebrate solution for spatial sensory integration and action. *Curr Biol* 31,  
1142 R741–R762.
- 1143 Ito, S., Feldheim, D.A., and Litke, A.M. (2017). Segregation of Visual Response Properties in the  
1144 Mouse Superior Colliculus and Their Modulation during Locomotion. *J Neurosci* 37, 8428–8443.
- 1145 Jin, J., Wang, Y., Swadlow, H.A., and Alonso, J.M. (2011). Population receptive fields of ON and  
1146 OFF thalamic inputs to an orientation column in visual cortex. *Nat Neurosci* 14, 232–238.
- 1147 Jouhanneau, J.-S., Kremkow, J., Dorn, A.L., and Poulet, J.F.A. (2015). In Vivo Monosynaptic  
1148 Excitatory Transmission between Layer 2 Cortical Pyramidal Neurons. *Cell Reports* 13, 2098–  
1149 2106.
- 1150 Jouhanneau, J.-S., Kremkow, J., and Poulet, J.F.A. (2018). Single synaptic inputs drive high-  
1151 precision action potentials in parvalbumin expressing GABA-ergic cortical neurons in vivo. *Nat*  
1152 *Commun* 9, 1540.
- 1153 Jun, J.J., Steinmetz, N.A., Siegle, J.H., Denman, D.J., Bauza, M., Barbarits, B., Lee, A.K.,  
1154 Anastassiou, C.A., Andrei, A., Aydın, Ç., et al. (2017). Fully integrated silicon probes for high-  
1155 density recording of neural activity. *Nature* 551, 232–236.
- 1156 Kaplan, E., and Shapley, R. (1984). The origin of the S (slow) potential in the mammalian lateral  
1157 geniculate nucleus. *Experimental Brain Research* 55, 111–116.
- 1158 Kremkow, J., and Alonso, J.-M. (2018). Thalamocortical Circuits and Functional Architecture.  
1159 *Annu Rev Vis Sc* 4, 1–23.
- 1160 Kremkow, J., Jin, J., Wang, Y., and Alonso, J.M. (2016). Principles underlying sensory map  
1161 topography in primary visual cortex. *Nature* 533, 52–57.
- 1162 Kumar, A., Rotter, S., and Aertsen, A. (2010). Spiking activity propagation in neuronal networks:  
1163 reconciling different perspectives on neural coding. *Nat Rev Neurosci* 11, 615–627.
- 1164 Lee, K.H., Tran, A., Turan, Z., and Meister, M. (2020). The sifting of visual information in the  
1165 superior colliculus. *Elife* 9, e50678.

- 1166 Li, Y., Turan, Z., and Meister, M. (2020). Functional Architecture of Motion Direction in the  
1167 Mouse Superior Colliculus. *Curr Biol* 30, 3304-3315.e4.
- 1168 Lien, A.D., and Scanziani, M. (2018). Cortical direction selectivity emerges at convergence of  
1169 thalamic synapses. *Nature* 558, 80–86.
- 1170 Liew, Y.J., Pala, A., Whitmire, C.J., Stoy, W.A., Forest, C.R., and Stanley, G.B. (2021). Inferring  
1171 thalamocortical monosynaptic connectivity in vivo. *J Neurophysiol* 125, 2408–2431.
- 1172 Martersteck, E.M., Hirokawa, K.E., Evarts, M., Bernard, A., Duan, X., Li, Y., Ng, L., Oh, S.W.,  
1173 Ouellette, B., Royall, J.J., et al. (2017). Diverse Central Projection Patterns of Retinal Ganglion  
1174 Cells. *Cell Reports* 18, 2058–2072.
- 1175 Mastronarde, D.N. (1983). Interactions between ganglion cells in cat retina. *J Neurophysiol* 49,  
1176 350–365.
- 1177 Mastronarde, D.N. (1989). Correlated firing of retinal ganglion cells. *Trends in Neurosciences* 12,  
1178 75–80.
- 1179 Mathis, A., Mamidanna, P., Cury, K.M., Abe, T., Murthy, V.N., Mathis, M.W., and Bethge, M.  
1180 (2018). DeepLabCut: markerless pose estimation of user-defined body parts with deep learning.  
1181 *Nature Neuroscience* 21, 1281–1289.
- 1182 Nath, A., and Schwartz, G.W. (2016). Cardinal Orientation Selectivity Is Represented by Two  
1183 Distinct Ganglion Cell Types in Mouse Retina. *J Neurosci* 36, 3208–3221.
- 1184 Niell, C.M., and Scanziani, M. (2021). How Cortical Circuits Implement Cortical Computations:  
1185 Mouse Visual Cortex as a Model. *Annu Rev Neurosci* 44, 1–30.
- 1186 Pachitariu, M., Steinmetz, N., Kadir, S., Carandini, M., and D, H.K. (2016). Kilosort: realtime  
1187 spike-sorting for extracellular electrophysiology with hundreds of channels. *BioRxiv* 061481.
- 1188 Paik, S.-B., and Ringach, D.L. (2011). Retinal origin of orientation maps in visual cortex. *Nat*  
1189 *Neurosci* 14, 919–925.
- 1190 Peirce, J.W. (2008). Generating Stimuli for Neuroscience Using PsychoPy. *Frontiers in*  
1191 *Neuroinformatics* 2, 10.
- 1192 Reid, R.C., and Alonso, J.-M. (1995). Specificity of monosynaptic connections from thalamus to  
1193 visual cortex. *Nature* 378, 281–284.
- 1194 Reinhard, K., Li, C., Do, Q., Burke, E.G., Heynderickx, S., and Farrow, K. (2019). A projection  
1195 specific logic to sampling visual inputs in mouse superior colliculus. *Elife* 8, e50697.
- 1196 Rhoades, R.W., and Chalupa, L.M. (1979). Conduction velocity distribution of the retinal input to  
1197 the hamster's superior colliculus and a correlation with receptive field characteristics. *J Comp*  
1198 *Neurol* 184, 243–263.
- 1199 Rosón, M.R., Bauer, Y., Kotkat, A.H., Berens, P., Euler, T., and Busse, L. (2019). Mouse dLGN  
1200 Receives Functional Input from a Diverse Population of Retinal Ganglion Cells with Limited  
1201 Convergence. *Neuron* 102, 462-476.e8.

- 1202 Roy, S., Jun, N.Y., Davis, E.L., Pearson, J., and Field, G.D. (2021). Inter-mosaic coordination of  
1203 retinal receptive fields. *Nature* 592, 409–413.
- 1204 Savier, E.L., Chen, H., and Cang, J. (2019). Effects of Locomotion on Visual Responses in the  
1205 Mouse Superior Colliculus. *The Journal of Neuroscience : The Official Journal of the Society for*  
1206 *Neuroscience* 39, 9360–9368.
- 1207 Schmidt, A., Engelage, J., and Bischof, H.-J. (1999). Single cell responses from the optic tectum  
1208 of the zebra finch (*Taeniopygia guttata castanotis* Gould). *J Comp Physiology* 185, 69–79.
- 1209 Shang, C., Chen, Z., Liu, A., Li, Y., Zhang, J., Qu, B., Yan, F., Zhang, Y., Liu, W., Liu, Z., et al.  
1210 (2018). Divergent midbrain circuits orchestrate escape and freezing responses to looming stimuli  
1211 in mice. *Nat Commun* 9, 1232.
- 1212 Shein-Idelson, M., Pammer, L., Hemberger, M., and Laurent, G. (2017). Large-scale mapping of  
1213 cortical synaptic projections with extracellular electrode arrays. *Nat Methods* 14, 882–890.
- 1214 Shi, X., Barchini, J., Ledesma, H.A., Koren, D., Jin, Y., Liu, X., Wei, W., and Cang, J. (2017).  
1215 Retinal origin of direction selectivity in the superior colliculus. *Nat Neurosci* 20, 550–558.
- 1216 Sibille, J., Gehr, C., Teh, K.L., and Kremkow, J. (2021). Tangential high-density electrode  
1217 insertions allow to simultaneously measure neuronal activity across an extended region of the  
1218 visual field in mouse superior colliculus. *Biorxiv* 2021.06.12.448191.
- 1219 Siegle, J.H., Jia, X., Durand, S., Gale, S., Bennett, C., Graddis, N., Heller, G., Ramirez, T.K.,  
1220 Choi, H., Luviano, J.A., et al. (2021). Survey of spiking in the mouse visual system reveals  
1221 functional hierarchy. *Nature* 1, 1–7.
- 1222 Smith, M.A., and Kohn, A. (2008). Spatial and temporal scales of neuronal correlation in primary  
1223 visual cortex. *The Journal of Neuroscience : The Official Journal of the Society for Neuroscience*  
1224 28, 12591–12603.
- 1225 Steinmetz, N.A., Aydin, C., Lebedeva, A., Okun, M., Pachitariu, M., Bauza, M., Beau, M.,  
1226 Bhagat, J., Böhm, C., Broux, M., et al. (2021). Neuropixels 2.0: A miniaturized high-density  
1227 probe for stable, long-term brain recordings. *Science* 372, eabf4588.
- 1228 Sterratt, D.C., Lyngholm, D., Willshaw, D.J., and Thompson, I.D. (2013). Standard anatomical  
1229 and visual space for the mouse retina: computational reconstruction and transformation of  
1230 flattened retinæ with the Retistruct package. *PLoS Computational Biology* 9, e1002921.
- 1231 Stoelzel, C.R., Bereshpolova, Y., Gusev, A.G., and Swadlow, H.A. (2008). The Impact of an  
1232 LGNd Impulse on the Awake Visual Cortex: Synaptic Dynamics and the Sustained/Transient  
1233 Distinction. *J Neurosci* 28, 5018–5028.
- 1234 Swadlow, H.A., and Gusev, A.G. (2000). The Influence of Single VB Thalamocortical Impulses  
1235 on Barrel Columns of Rabbit Somatosensory Cortex. *J Neurophysiol* 83, 2802–2813.
- 1236 Swadlow, H.A., and Gusev, A.G. (2002). Receptive-field construction in cortical inhibitory  
1237 interneurons. *Nature Neuroscience* 5, 403–404.

- 1238 Swadlow, H.A., Gusev, A.G., and Bezdudnaya, T. (2002). Activation of a Cortical Column by a  
1239 Thalamocortical Impulse. *J Neurosci* 22, 7766–7773.
- 1240 Usrey, W.M., Reppas, J.B., and Reid, R.C. (1998). Paired-spike interactions and synaptic  
1241 efficacy of retinal inputs to the thalamus. *Nature* 395, 384–387.
- 1242 Usrey, W.M., Reppas, J.B., and Reid, R.C. (1999). Specificity and strength of retinogeniculate  
1243 connections. *Journal of Neurophysiology* 82, 3527–3540.
- 1244 Wang, L., Sarnaik, R., Rangarajan, K., Liu, X., and Cang, J. (2010). Visual Receptive Field  
1245 Properties of Neurons in the Superficial Superior Colliculus of the Mouse. *J Neurosci* 30, 16573–  
1246 16584.
- 1247 Wässle, H., Peichl, L., and Boycott, B.B. (1981a). Dendritic territories of cat retinal ganglion  
1248 cells. *Nature* 292, 344–345.
- 1249 Wässle, H., Boycott, B.B., and Illing, R.B. (1981b). Morphology and mosaic of on- and off-beta  
1250 cells in the cat retina and some functional considerations. *Proceedings of the Royal Society of*  
1251 *London. Series B, Containing Papers of a Biological Character. Royal Society (Great Britain)*  
1252 212, 177–195.
- 1253 Wässle, H., Peichl, L., and Boycott, B.B. (1981c). Morphology and topography of on- and off-  
1254 alpha cells in the cat retina. *Proc Royal Soc Lond Ser B Biological Sci* 212, 157–175.
- 1255 Wertz, A., Trenholm, S., Yonehara, K., Hillier, D., Raics, Z., Leinweber, M., Szalay, G., Ghanem,  
1256 A., Keller, G., Rózsa, B., et al. (2015). Single-cell-initiated monosynaptic tracing reveals layer-  
1257 specific cortical network modules. *Science* 349, 70–74.
- 1258 Xiao, R., and Xu, X.Z.S. (2020). Temperature Sensation: From Molecular Thermosensors to  
1259 Neural Circuits and Coding Principles. *Annu Rev Physiol* 83, 1–26.
- 1260 Zhan, X.J., and Troy, J.B. (2000). Modeling cat retinal beta-cell arrays. *Visual Neurosci* 17, 23–  
1261 39.
- 1262
